# Supplementary material for: Naphtho[1,8-de][1,2]Oxazin-4-ol: Precursor to 1,2,8-Trisubstituted Naphthalenes and 1-Unsubstituted Naphtho[1,2-d]isoxazole 2-Oxide: A Novel Isomerization of the N-Oxide to Nitrile Oxide en Route to Isoxazol(in)es
Source: MDPI journal article supplement (doi:10.3390/molecules29010048), 2023-12-20
Supplement: s1 [file s1]

## Supporting Information

# Naphtho[1,8-*de*][1,2]Oxazin-4-ol: Precursor to 1,2,8-Trisubstituted Naphthalenes and 1-Unsubstituted Naphtho[1,2-*d*]isoxazole 2-Oxide: A Novel Isomerization of the *N*-Oxide to Nitrile Oxide *en Route* to Isoxazol(in)es

Ioannis E. Gerontitis <sup>1</sup>, Petros G. Tsoungas <sup>2</sup> and George Varvounis <sup>1,\*</sup>

<sup>1</sup> Section of Organic Chemistry and Biochemistry, Department of Chemistry, University of Ioannina, 451 10 Ioannina, Greece; giannhs\_ger@yahoo.gr

<sup>2</sup> Department of Biochemistry, Hellenic Pasteur Institute, 127 Vas. Sofias Ave., 115 21 Athens, Greece; pgt@otenet.gr

\* Correspondence: gvarvoun@uoi.gr; Tel.: +30-694-489-9172

## Contents

|                                                                                                                            |    |
|----------------------------------------------------------------------------------------------------------------------------|----|
| <b>Figure S1.</b> <sup>1</sup> H NMR (400 MHz, CDCl <sub>3</sub> ) of compound ( <b>11</b> ). .....                        | 4  |
| <b>Figure S2.</b> <sup>13</sup> C NMR (100.6 MHz, CDCl <sub>3</sub> ) of compound ( <b>11</b> ). .....                     | 4  |
| <b>Figure S3.</b> HRMS [M+H] <sup>+</sup> of compound ( <b>11</b> ) using 0.1% HCO <sub>2</sub> H in MeOH as solvent.....  | 4  |
| <b>Figure S4.</b> IR spectrum (solid) of compound ( <b>11</b> ). .....                                                     | 5  |
| <b>Figure S5.</b> <sup>1</sup> H NMR (400 MHz, DMSO- <i>d</i> <sub>6</sub> ) of compound ( <b>5</b> ). .....               | 5  |
| <b>Figure S6.</b> <sup>1</sup> H NMR (400 MHz, CDCl <sub>3</sub> ) of compound ( <b>12</b> ). .....                        | 6  |
| <b>Figure S7.</b> <sup>13</sup> C NMR (100.6 MHz, CDCl <sub>3</sub> ) of compound ( <b>12</b> ). .....                     | 6  |
| <b>Figure S8.</b> HRMS [M+H] <sup>+</sup> of compound ( <b>12</b> ) using 0.1% HCO <sub>2</sub> H in MeOH as solvent.....  | 7  |
| <b>Figure S9.</b> IR spectrum (solid) of compound ( <b>12</b> ). .....                                                     | 7  |
| <b>Figure S10.</b> <sup>1</sup> H NMR (400 MHz, CDCl <sub>3</sub> ) of compound ( <b>13</b> ). .....                       | 8  |
| <b>Figure S11.</b> <sup>13</sup> C NMR (400 MHz, CDCl <sub>3</sub> ) of compound ( <b>13</b> ). .....                      | 8  |
| <b>Figure S12.</b> HRMS [M+H] <sup>+</sup> of compound ( <b>13</b> ) using 0.1% HCO <sub>2</sub> H in MeOH as solvent..... | 9  |
| <b>Figure S13.</b> IR spectrum (solid) of compound ( <b>13</b> ). .....                                                    | 9  |
| <b>Figure S14.</b> <sup>1</sup> H NMR (400 MHz, CDCl <sub>3</sub> ) of compound ( <b>14</b> ). .....                       | 10 |
| <b>Figure S15.</b> <sup>1</sup> H NMR (400 MHz, DMSO- <i>d</i> <sub>6</sub> ) of compound ( <b>15</b> ). .....             | 10 |
| <b>Figure S16.</b> <sup>13</sup> C NMR (100.6 MHz, DMSO- <i>d</i> <sub>6</sub> ) of compound ( <b>15</b> ). .....          | 11 |
| <b>Figure S17.</b> HRMS [M+H] <sup>+</sup> of compound ( <b>15</b> ) using 0.1% HCO <sub>2</sub> H in MeOH as solvent..... | 11 |
| <b>Figure S18.</b> IR spectrum (solid) of compound ( <b>15</b> ). .....                                                    | 12 |
| <b>Figure S19.</b> <sup>1</sup> H NMR (400 MHz, DMSO- <i>d</i> <sub>6</sub> ) of compound ( <b>16</b> ). .....             | 12 |
| <b>Figure S20.</b> <sup>13</sup> C NMR (100.6 MHz, DMSO- <i>d</i> <sub>6</sub> ) of compound ( <b>16</b> ). .....          | 13 |
| <b>Figure S21.</b> HRMS [M+H] <sup>+</sup> of compound ( <b>16</b> ) using 0.1% HCO <sub>2</sub> H in MeOH as solvent..... | 13 |
| <b>Figure S22.</b> IR spectrum (solid) of compound ( <b>16</b> ). .....                                                    | 14 |

|                                                                                                                                                          |    |
|----------------------------------------------------------------------------------------------------------------------------------------------------------|----|
| <b>Figure S23.</b> $^1\text{H}$ NMR (400 MHz, $\text{DMSO}-d_6$ ) of ( <b>17</b> ).....                                                                  | 14 |
| <b>Figure S24.</b> $^{13}\text{C}$ NMR (100.6 MHz, $\text{DMSO}-d_6$ ) of ( <b>17</b> ).....                                                             | 15 |
| <b>Figure S25.</b> HRMS $[\text{M}+\text{H}]^+$ of compound ( <b>17</b> ) using 0.1% $\text{HCO}_2\text{H}$ in MeOH as solvent.....                      | 15 |
| <b>Figure S26.</b> IR spectrum (solid) of ( <b>17</b> ).....                                                                                             | 16 |
| <b>Figure S27.</b> $^1\text{H}$ NMR (400 MHz, $\text{DMSO}-d_6$ ) of ( <b>18</b> ).....                                                                  | 16 |
| <b>Figure S28.</b> $^{13}\text{C}$ NMR (100.6 MHz, $\text{DMSO}-d_6$ ) of ( <b>18</b> ).....                                                             | 17 |
| <b>Figure S29.</b> HRMS $[\text{M}+\text{H}]^+$ of compound ( <b>18</b> ) using 0.1% $\text{HCO}_2\text{H}$ in MeOH as solvent.....                      | 17 |
| <b>Figure S30.</b> IR spectrum (solid) of ( <b>18</b> ).....                                                                                             | 18 |
| <b>Figure S31.</b> $^1\text{H}$ NMR (400 MHz, $\text{CDCl}_3$ ) of ( <b>19</b> ).....                                                                    | 18 |
| <b>Figure S32.</b> $^1\text{H}$ NMR (400 MHz, $\text{CDCl}_3$ ) of ( <b>20</b> ).....                                                                    | 19 |
| <b>Figure S33.</b> $^1\text{H}$ NMR (400 MHz, $\text{CDCl}_3$ ) of ( <b>21</b> ).....                                                                    | 19 |
| <b>Figure S34.</b> $^1\text{H}$ NMR (400 MHz, $\text{CDCl}_3$ ) of ( <b>22</b> ).....                                                                    | 20 |
| <b>Figure S35.</b> $^{13}\text{C}$ NMR (100.6 MHz, $\text{CDCl}_3$ ) of ( <b>22</b> ).....                                                               | 20 |
| <b>Figure S36.</b> HRMS $[\text{M}+\text{H}]^+$ of compound ( <b>22</b> ) using 0.1% $\text{HCO}_2\text{H}$ in MeOH as solvent.....                      | 21 |
| <b>Figure S37.</b> IR spectrum (solid) of ( <b>22</b> ).....                                                                                             | 21 |
| <b>Figure S38.</b> $^1\text{H}$ NMR (400 MHz, $\text{CDCl}_3$ ) of ( <b>23</b> ).....                                                                    | 22 |
| <b>Figure S39.</b> $^{13}\text{C}$ NMR (100.6 MHz, $\text{CDCl}_3$ ) of ( <b>23</b> ).....                                                               | 22 |
| <b>Figure S40.</b> HRMS $[\text{M}+\text{H}]^+$ of compound ( <b>23</b> ) using 0.1% $\text{HCO}_2\text{H}$ in MeOH as solvent.....                      | 23 |
| <b>Figure S41.</b> IR spectrum (solid) of ( <b>23</b> ).....                                                                                             | 23 |
| <b>Figure S42.</b> $^1\text{H}$ NMR (400 MHz, $\text{CDCl}_3$ ) of ( <b>24</b> ).....                                                                    | 24 |
| <b>Figure S43.</b> $^{13}\text{C}$ NMR (100.6 MHz, $\text{CDCl}_3$ ) of ( <b>24</b> ).....                                                               | 24 |
| <b>Figure S44.</b> HRMS $[\text{M}+\text{H}]^+$ of compound ( <b>24</b> ) using 0.1% $\text{HCO}_2\text{H}$ in MeOH as solvent.....                      | 25 |
| <b>Figure S45.</b> IR spectrum (solid state) of ( <b>24</b> ).....                                                                                       | 25 |
| <b>Figure S46.</b> $^1\text{H}$ NMR (400 MHz, $\text{CDCl}_3$ ) of ( <b>25</b> ).....                                                                    | 26 |
| <b>Figure S47.</b> $^{13}\text{C}$ NMR [100.6 MHz, $\text{CDCl}_3$ ] of ( <b>25</b> ).....                                                               | 26 |
| <b>Figure S48.</b> HRMS $[\text{M}+\text{H}]^+$ of compound ( <b>25</b> ) using 0.1% $\text{HCO}_2\text{H}$ in MeOH as solvent.....                      | 27 |
| <b>Figure S49.</b> IR spectrum (solid state) of ( <b>25</b> ).....                                                                                       | 27 |
| <b>Figure S50.</b> $^1\text{H}$ NMR (400 MHz, $\text{DMSO}-d_6$ ) of ( <b>6</b> ).....                                                                   | 28 |
| <b>Figure S51.</b> $^1\text{H}$ NMR (400 MHz, $\text{CDCl}_3$ ) of ( <b>8</b> ).....                                                                     | 28 |
| <b>Figure S52.</b> $^{13}\text{C}$ NMR [100.6 MHz, $\text{CDCl}_3$ ] of ( <b>8</b> ).....                                                                | 29 |
| <b>Figure S53.</b> HRMS $[\text{M}+\text{H}]^+$ of compound ( <b>8</b> ) using 0.1% $\text{HCO}_2\text{H}$ in MeOH as solvent.....                       | 29 |
| <b>Figure S54.</b> IR spectrum of ( <b>8</b> ).....                                                                                                      | 30 |
| <b>Figure S55.</b> $^1\text{H}$ NMR (400 MHz, $\text{DMSO}-d_6$ ) of ( <b>9</b> ).....                                                                   | 30 |
| <b>Figure S56.</b> $^1\text{H}$ NMR (400 MHz, $\text{DMSO}-d_6 + \text{D}_2\text{O}$ ) of ( <b>9</b> ). .....                                            | 31 |
| <b>Figure S57.</b> $^{13}\text{C}$ NMR [100.6 MHz, $\text{DMSO}-d_6$ ] of ( <b>9</b> ).....                                                              | 31 |
| <b>Figure S58.</b> HRMS $[\text{M}+\text{H}]^+$ of compound ( <b>9</b> ) in $\text{DMSO}-d_6$ using 0.1% $\text{HCO}_2\text{H}$ in MeOH as solvent. .... | 32 |
| <b>Figure S59.</b> $^1\text{H}$ NMR (400 MHz, $\text{DMSO}-d_6$ ) of nitrile oxide ( <b>9</b> ) and isoxazole-2-oxide ( <b>8</b> ), superimposed. ....   | 33 |

|                                                                                                                                                                                                                  |    |
|------------------------------------------------------------------------------------------------------------------------------------------------------------------------------------------------------------------|----|
| <b>Figure S60.</b> $^1\text{H}$ NMR (400 MHz, $\text{DMSO}-d_6$ ) of nitrile oxide ( <b>9</b> ) and isoxazole-2-oxide ( <b>8</b> ), stacked.                                                                     | 33 |
| <b>Figure S61.</b> $^1\text{H}$ NMR (400 MHz, $\text{DMSO}-d_6$ ) time-course experiment of the ring opening of isoxazole-2-oxide ( <b>8</b> ) (top spectra) to nitrile oxide ( <b>9</b> ) (bottom spectra)..... | 33 |
| <b>Figure S62.</b> $^1\text{H}$ NMR (400 MHz, $\text{CDCl}_3$ ) of ( <b>10a</b> ).....                                                                                                                           | 34 |
| <b>Figure S63.</b> $^{13}\text{C}$ NMR (100.6 MHz, $\text{CDCl}_3$ ) of ( <b>10a</b> ).....                                                                                                                      | 34 |
| <b>Figure S64.</b> HRMS $[\text{M}+\text{H}]^+$ of compound ( <b>10a</b> ) using 0.1% $\text{HCO}_2\text{H}$ in MeOH as solvent.....                                                                             | 35 |
| <b>Figure S65.</b> IR spectrum (solid) of ( <b>10a</b> ).....                                                                                                                                                    | 35 |
| <b>Figure S66.</b> $^1\text{H}$ NMR (400 MHz, $\text{CDCl}_3$ ) of ( <b>10b</b> ). ....                                                                                                                          | 36 |
| <b>Figure S67.</b> $^{13}\text{C}$ NMR (100.6 MHz, $\text{CDCl}_3$ ) of ( <b>10b</b> ).....                                                                                                                      | 36 |
| <b>Figure S68.</b> HRMS $[\text{M}+\text{H}]^+$ of compound ( <b>10b</b> ) using 0.1% $\text{HCO}_2\text{H}$ in MeOH as solvent.....                                                                             | 37 |
| <b>Figure S69.</b> IR spectrum (solid) of ( <b>10b</b> ). ....                                                                                                                                                   | 37 |
| <b>Figure S70.</b> $^1\text{H}$ NMR (400 MHz, $\text{CDCl}_3$ ) of ( <b>10c</b> ).....                                                                                                                           | 38 |
| <b>Figure S71.</b> $^{13}\text{C}$ NMR (100.6 MHz, $\text{CDCl}_3$ ) of ( <b>10c</b> ).....                                                                                                                      | 38 |
| <b>Figure S72.</b> HRMS $[\text{M}+\text{H}]^+$ of compound ( <b>10c</b> ) using 0.1% $\text{HCO}_2\text{H}$ in MeOH as solvent. ....                                                                            | 39 |
| <b>Figure S73.</b> IR spectrum (solid) of ( <b>10c</b> ).....                                                                                                                                                    | 39 |
| <b>Figure S74.</b> $^1\text{H}$ NMR (400 MHz, $\text{CDCl}_3$ ) of ( <b>10d</b> ). ....                                                                                                                          | 40 |
| <b>Figure S75.</b> $^{13}\text{C}$ NMR (100.6 MHz, $\text{CDCl}_3$ ) of ( <b>10d</b> ).....                                                                                                                      | 40 |
| <b>Figure S76.</b> HRMS $[\text{M}+\text{H}]^+$ of compound ( <b>10d</b> ) using 0.1% $\text{HCO}_2\text{H}$ in MeOH as solvent.....                                                                             | 41 |
| <b>Figure S77.</b> IR spectrum (solid) of ( <b>10d</b> ). ....                                                                                                                                                   | 41 |

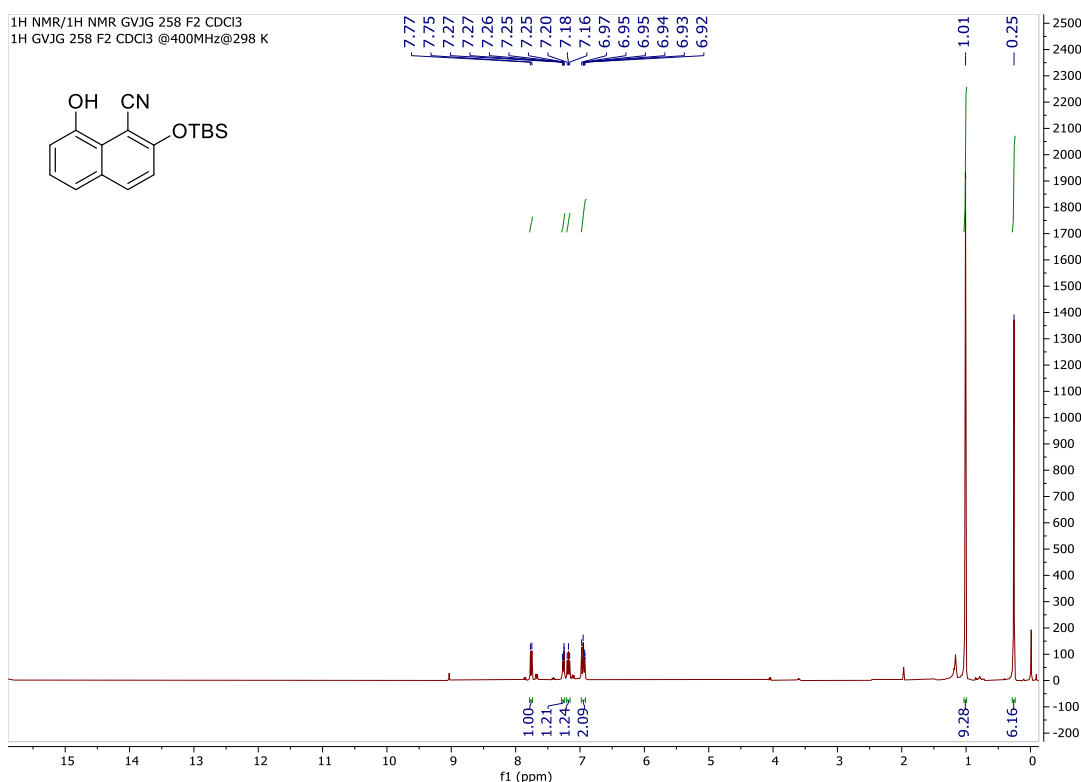

**Figure S1.**  $^1\text{H}$  NMR (400 MHz,  $\text{CDCl}_3$ ) of compound (**11**).

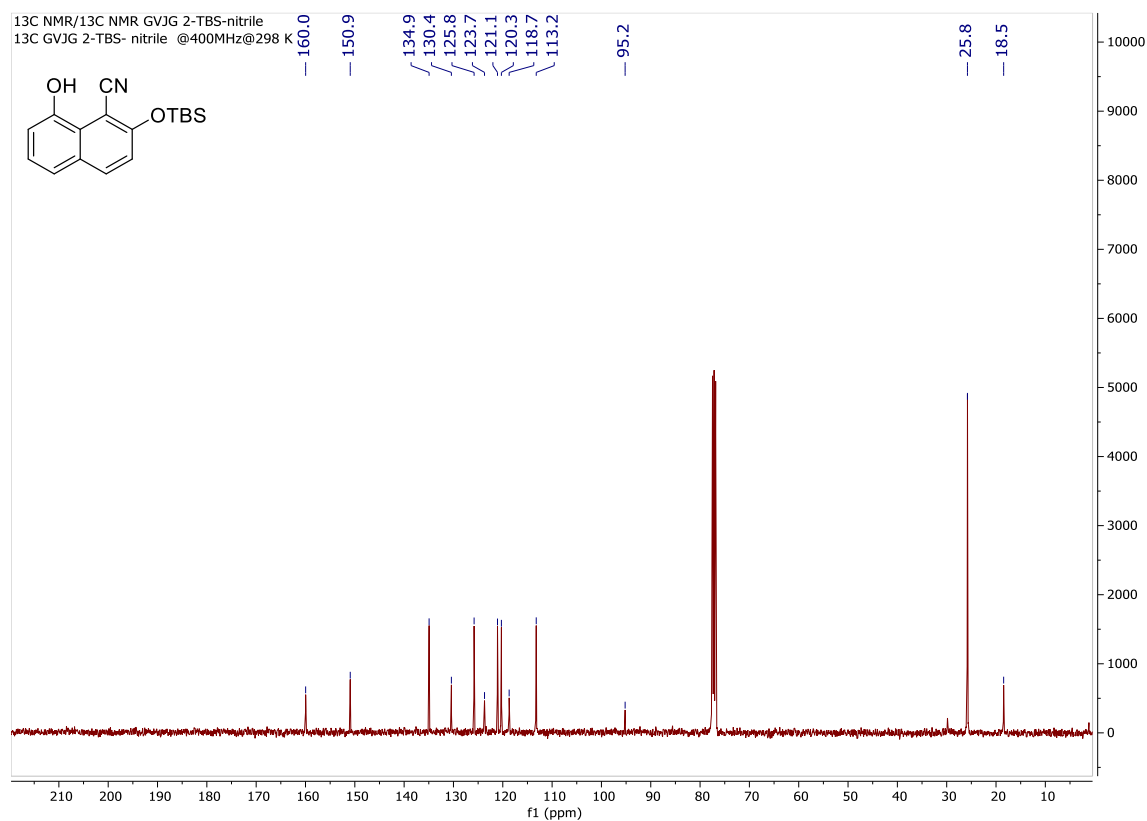

**Figure S2.**  $^{13}\text{C}$  NMR (100.6 MHz,  $\text{CDCl}_3$ ) of compound (**11**).

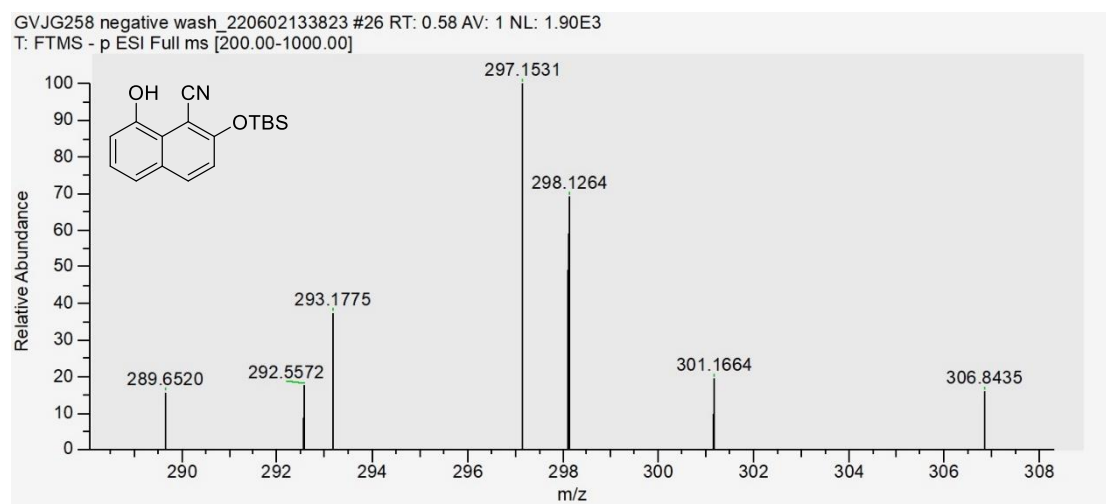

**Figure S3.** HRMS  $[\text{M}+\text{H}]^+$  of compound (**11**) using 0.1%  $\text{HCO}_2\text{H}$  in MeOH as solvent.

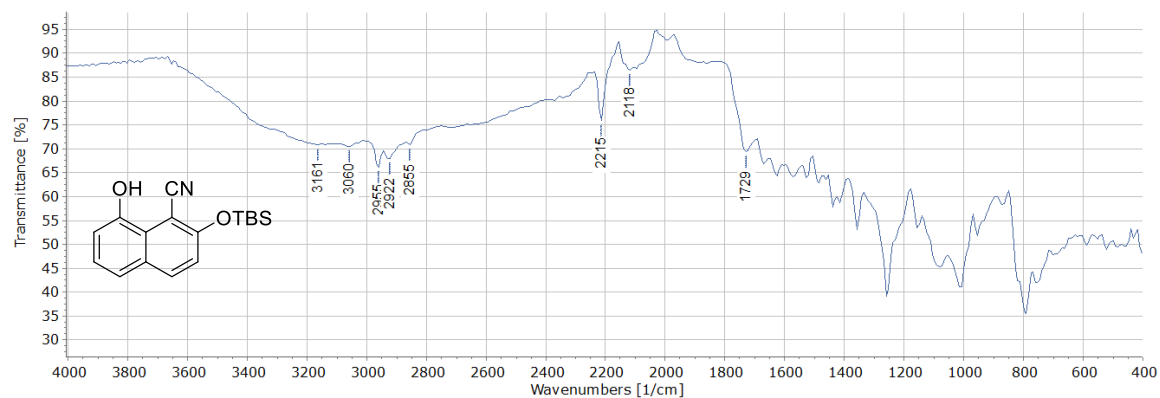

**Figure S4.** IR spectrum (solid) of compound (11).

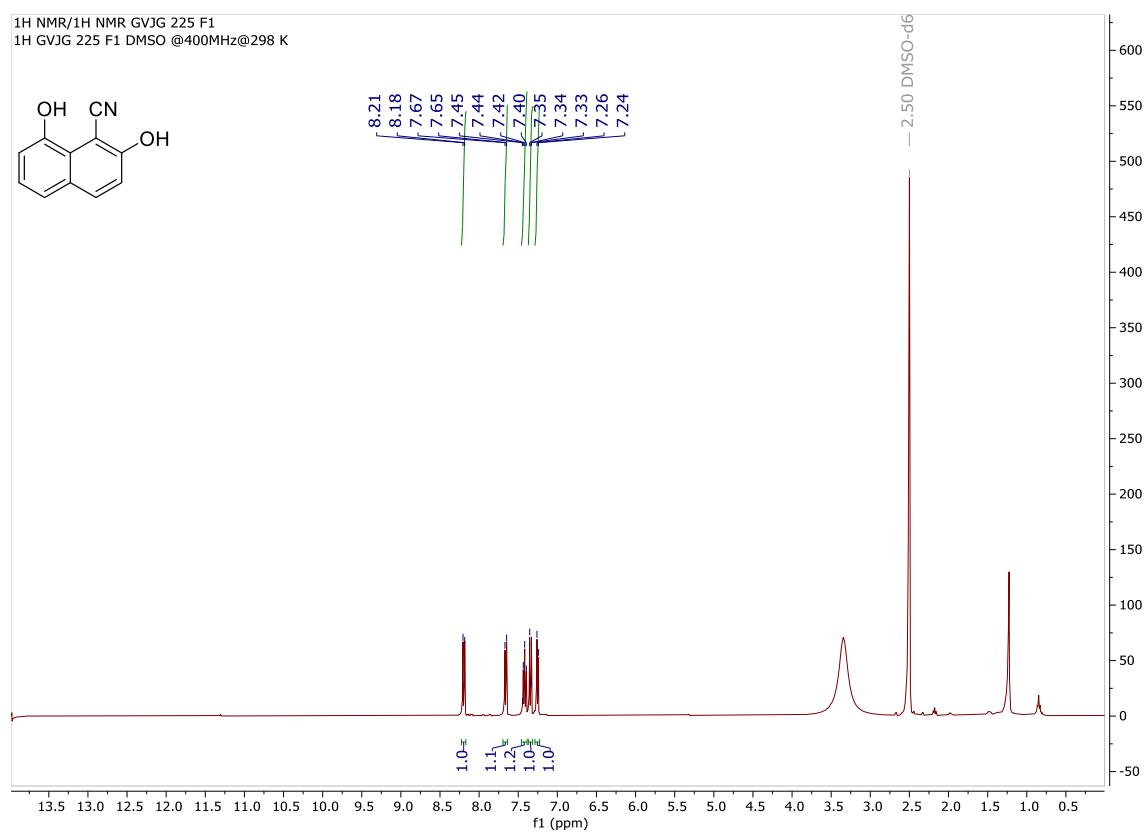

**Figure S5.** <sup>1</sup>H NMR (400 MHz, DMSO-*d*<sub>6</sub>) of compound (5).

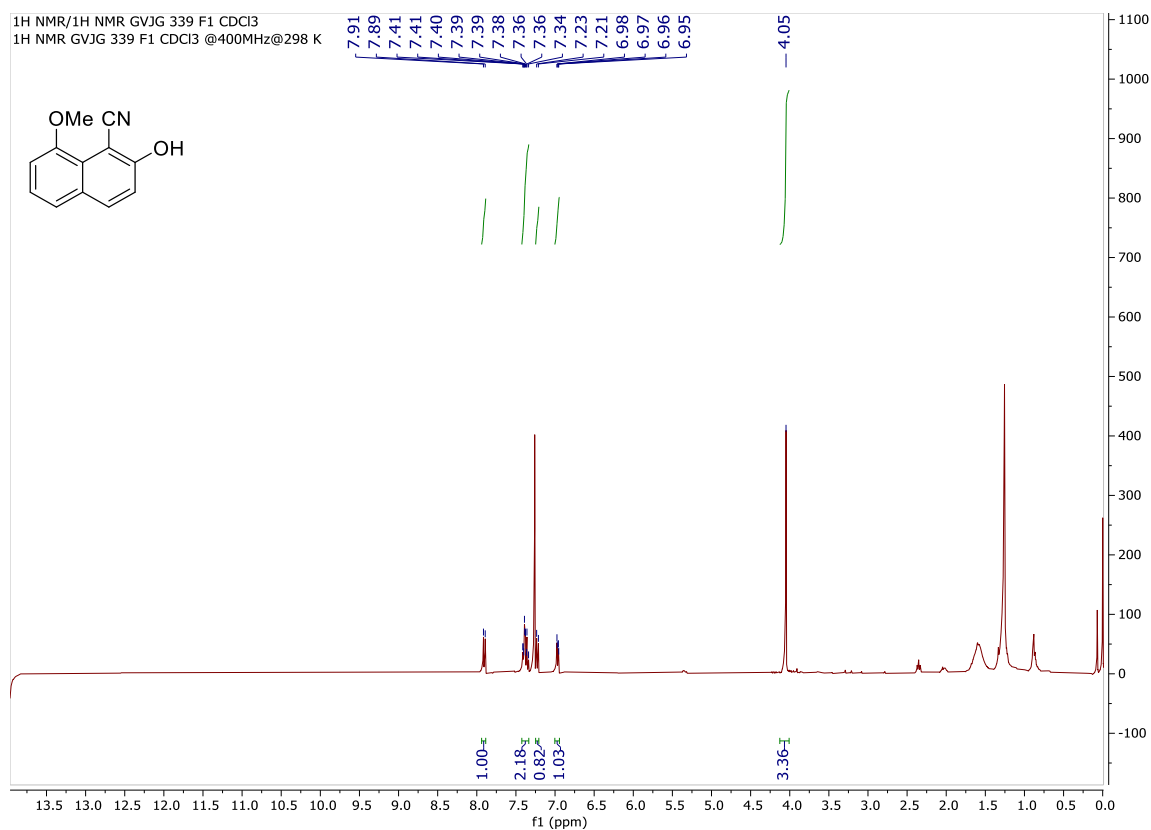

**Figure S6.**  $^1\text{H}$  NMR (400 MHz,  $\text{CDCl}_3$ ) of compound (12).

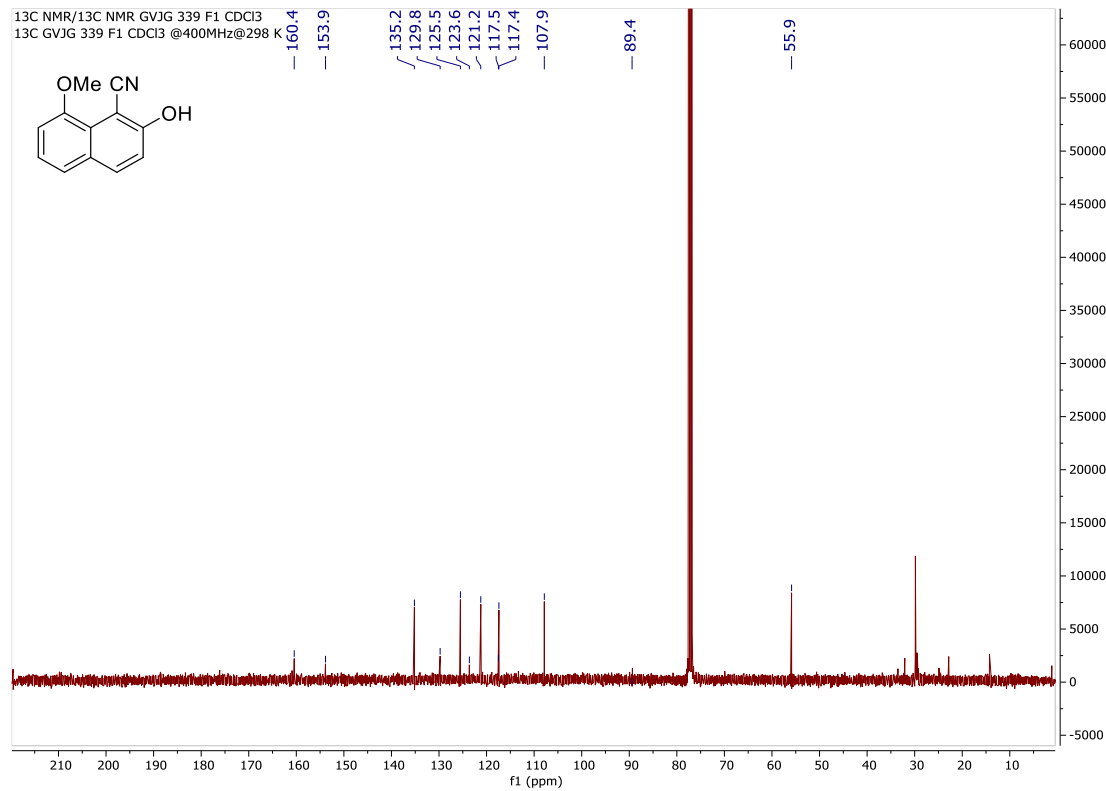

**Figure S7.**  $^{13}\text{C}$  NMR (100.6 MHz,  $\text{CDCl}_3$ ) of compound (12).

GVJG236\_200622131935 #17 RT: 0.16 AV: 1 NL: 3.45E7  
T: FTMS + p ESI Full ms [150.00-2000.00]

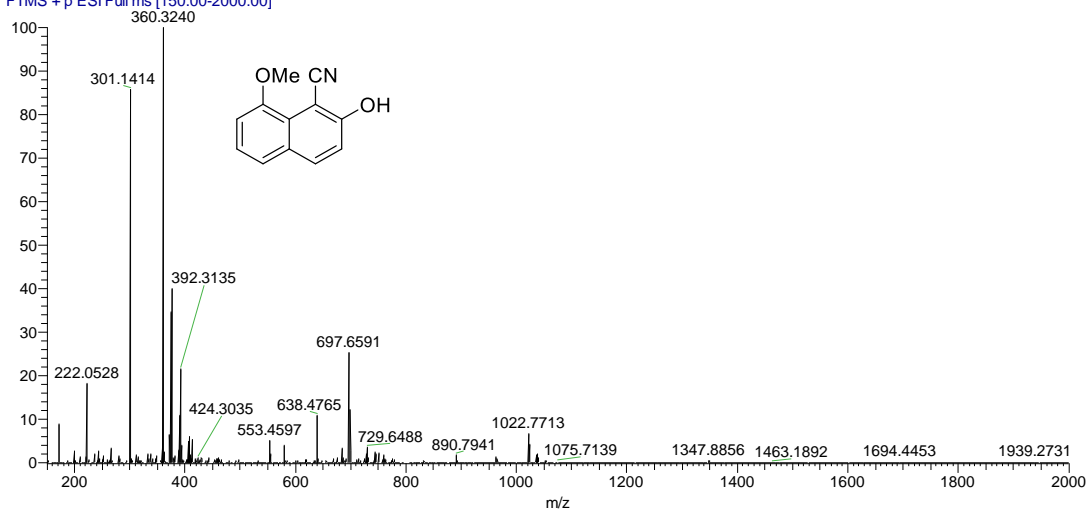

**Figure S8.** HRMS  $[M+H]^+$  of compound (12) using 0.1%  $HCO_2H$  in MeOH as solvent.

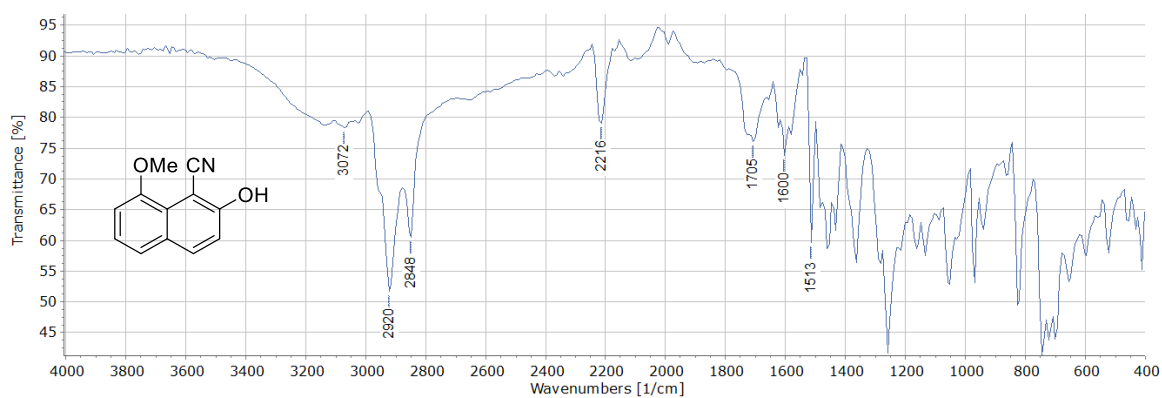

**Figure S9.** IR spectrum (solid) of compound (12).

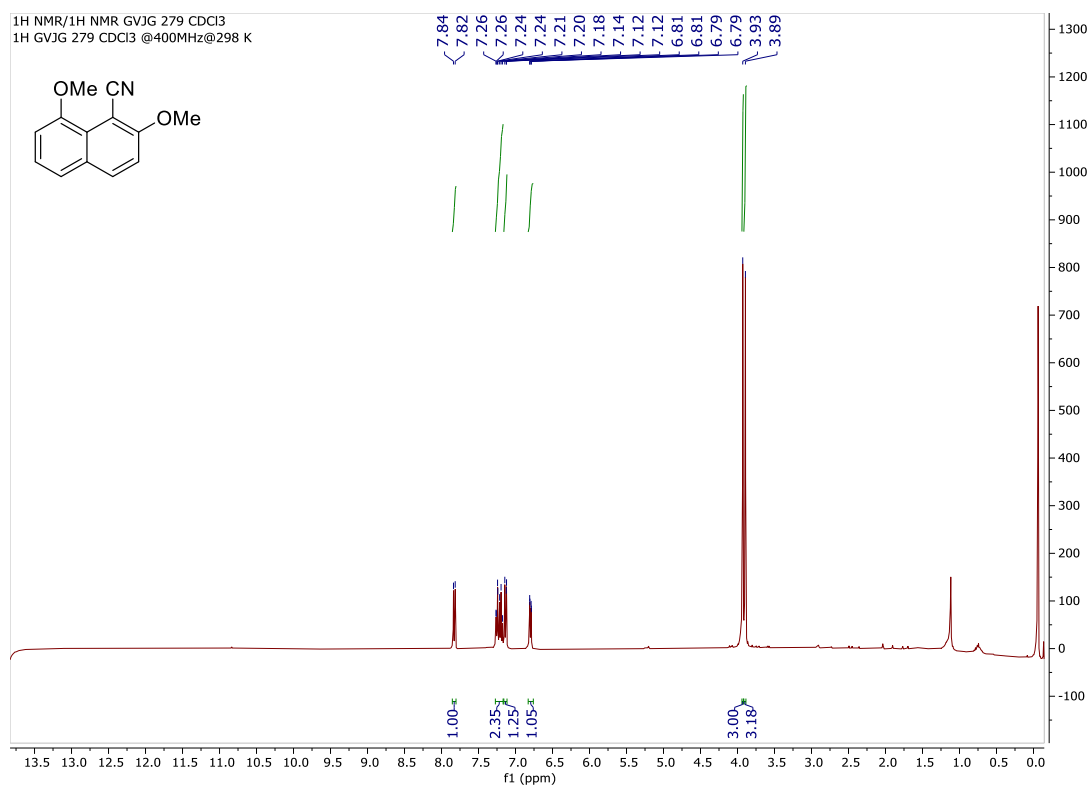

**Figure S10.** <sup>1</sup>H NMR (400 MHz, CDCl<sub>3</sub>) of compound (13).

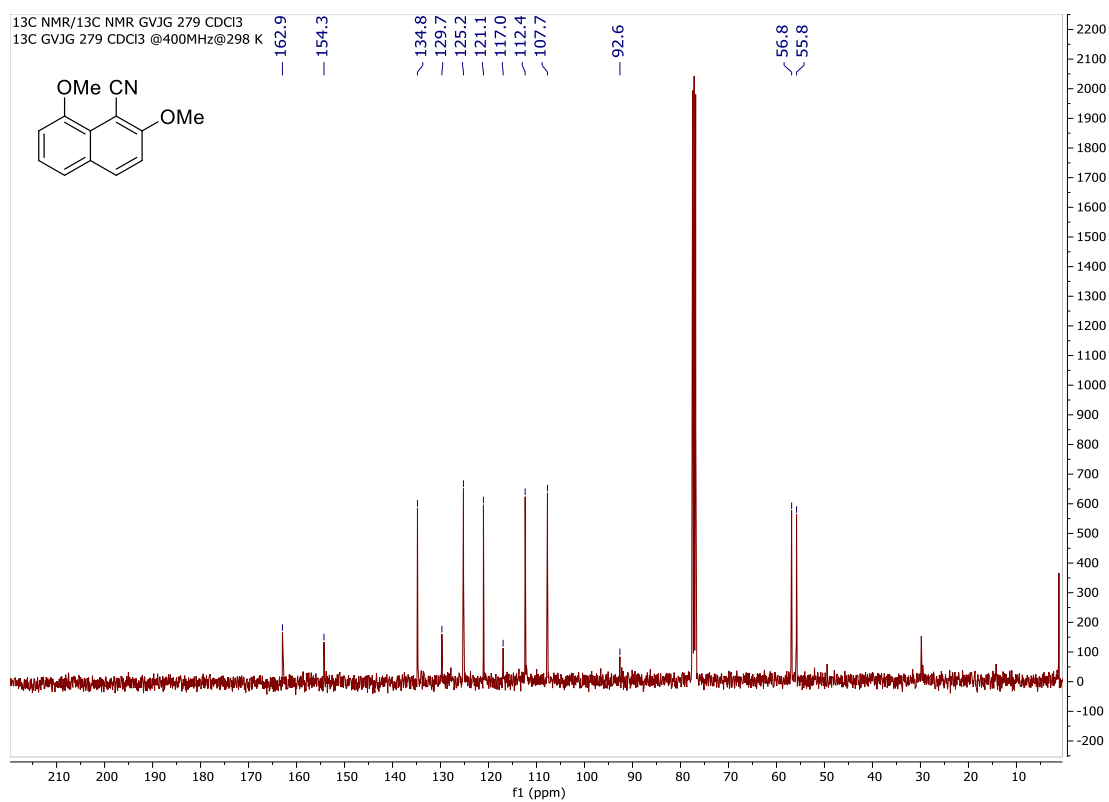

**Figure S11.** <sup>13</sup>C NMR (400 MHz, CDCl<sub>3</sub>) of compound (13).



GVJG279\_230622120242 #81 RT: 1.17 AV: 1 NL: 1.33E7  
T: FTMS + p ESI Full ms [150.00-400.00]

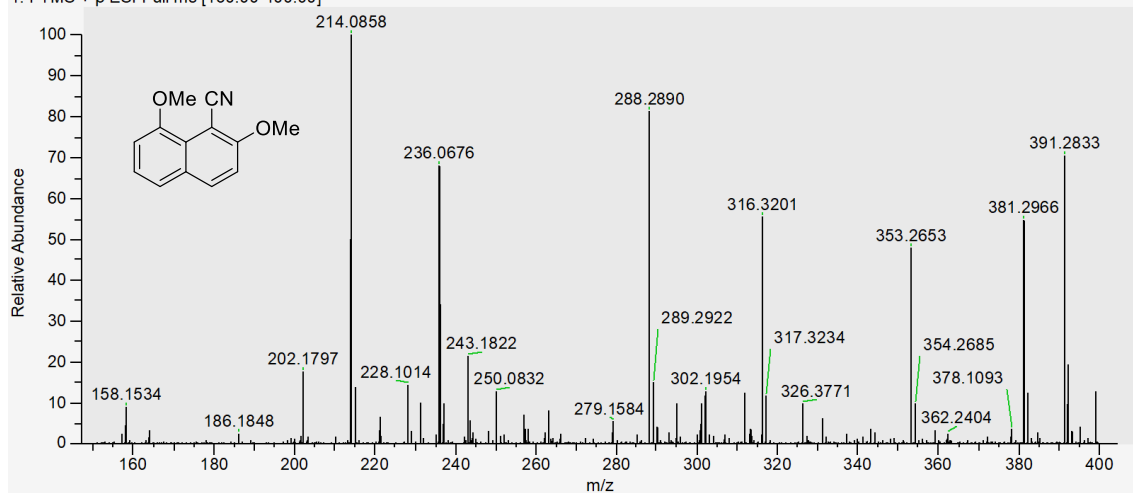

**Figure S12.** HRMS  $[M+H]^+$  of compound (13) using 0.1%  $HCO_2H$  in MeOH as solvent.

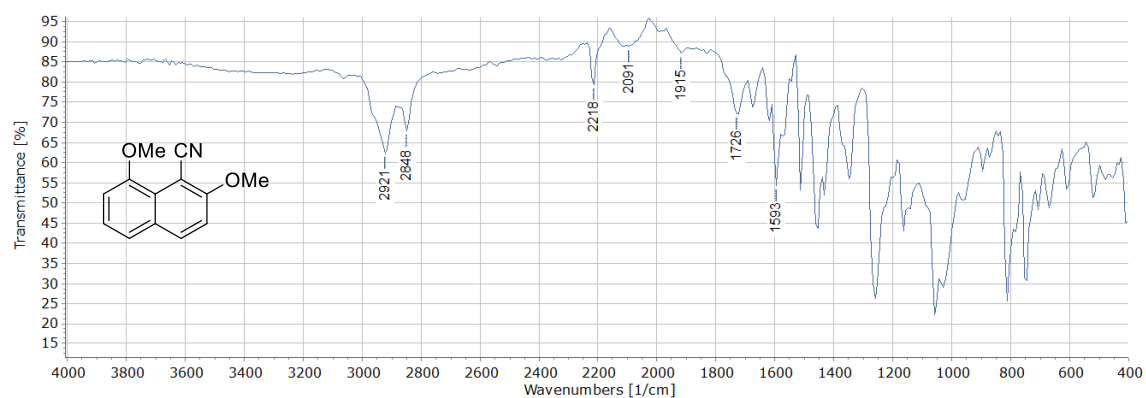

**Figure S13.** IR spectrum (solid) of compound (13).

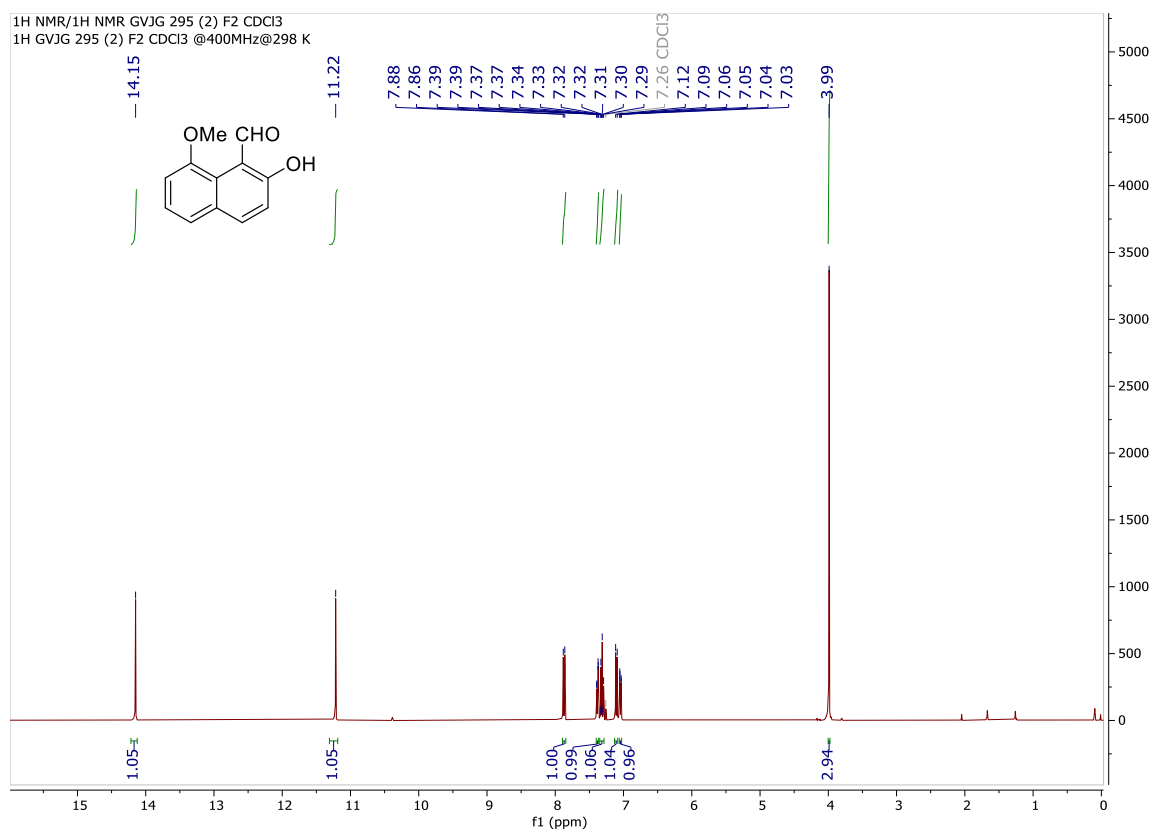

**Figure S14.**  $^1\text{H}$  NMR (400 MHz,  $\text{CDCl}_3$ ) of compound (14).

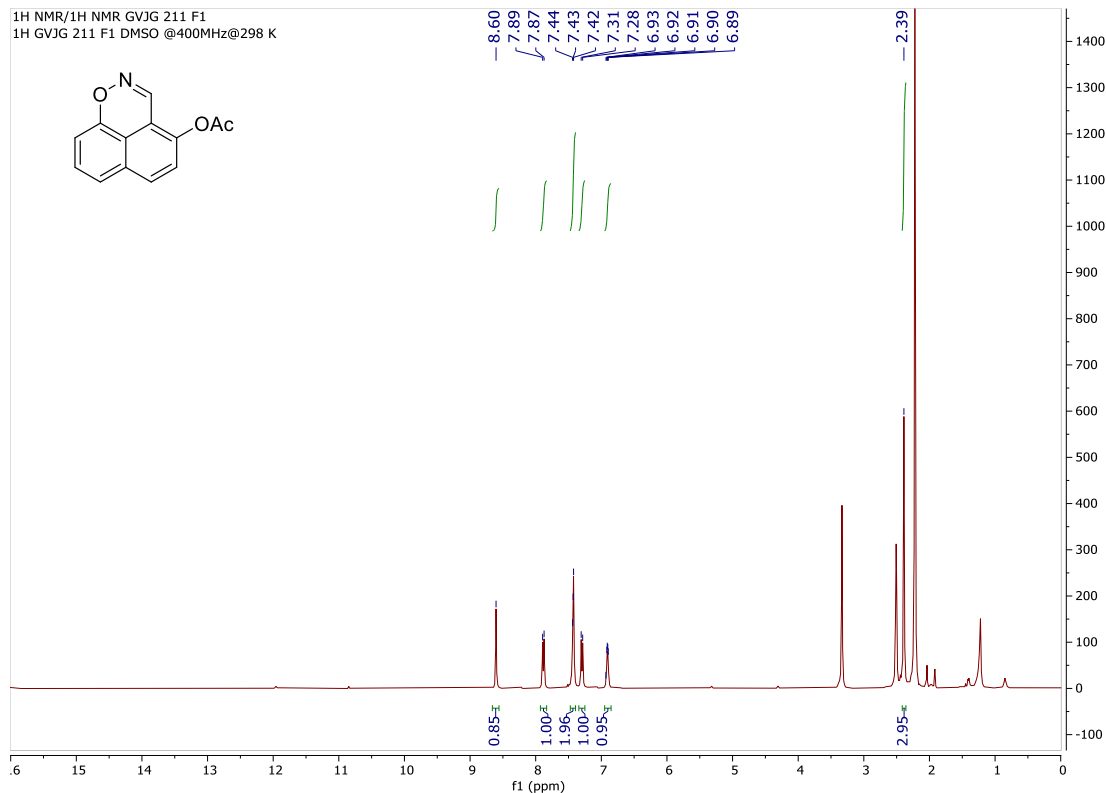

**Figure S15.**  $^1\text{H}$  NMR (400 MHz,  $\text{DMSO}-d_6$ ) of compound (15).

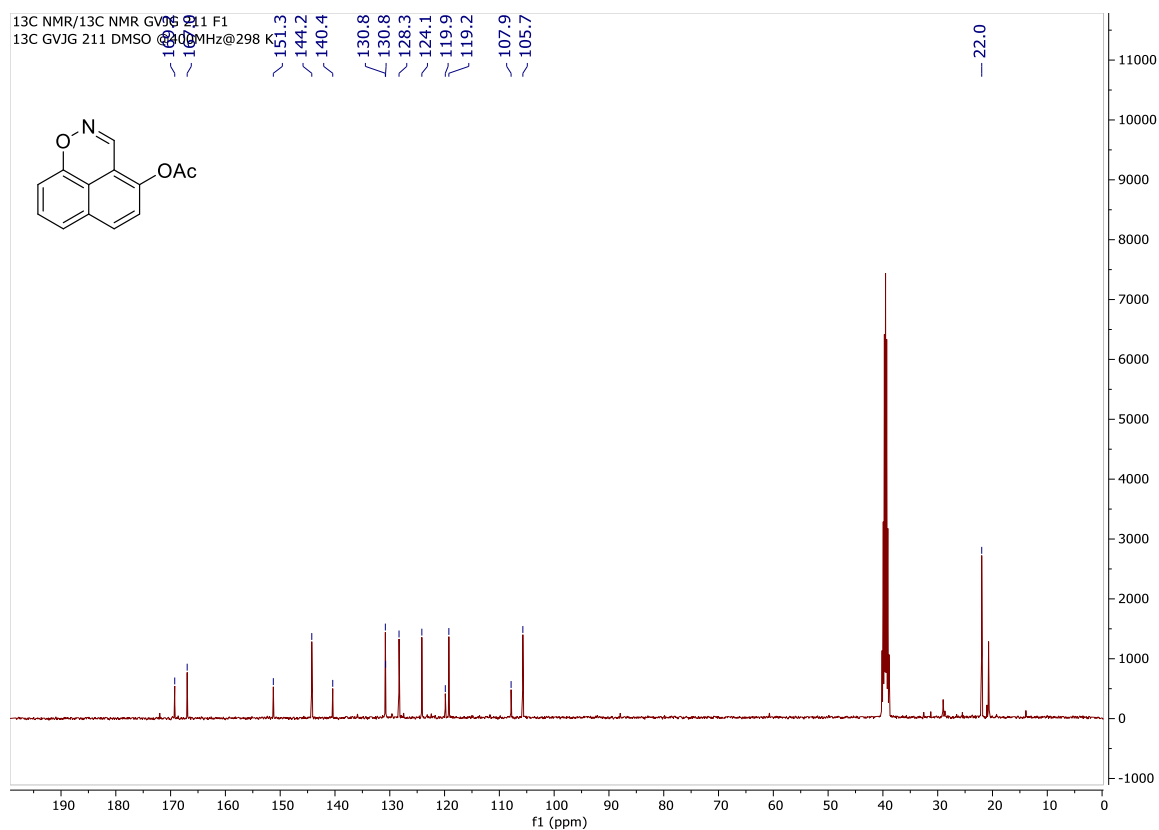

**Figure S16.**  $^{13}\text{C}$  NMR (100.6 MHz,  $\text{DMSO}-d_6$ ) of compound (15).

GVJG216\_200617170358 #1 RT: 0.00 AV: 1 NL: 1.66E6  
T: FTMS + p ESI Full ms [150.00-2000.00]

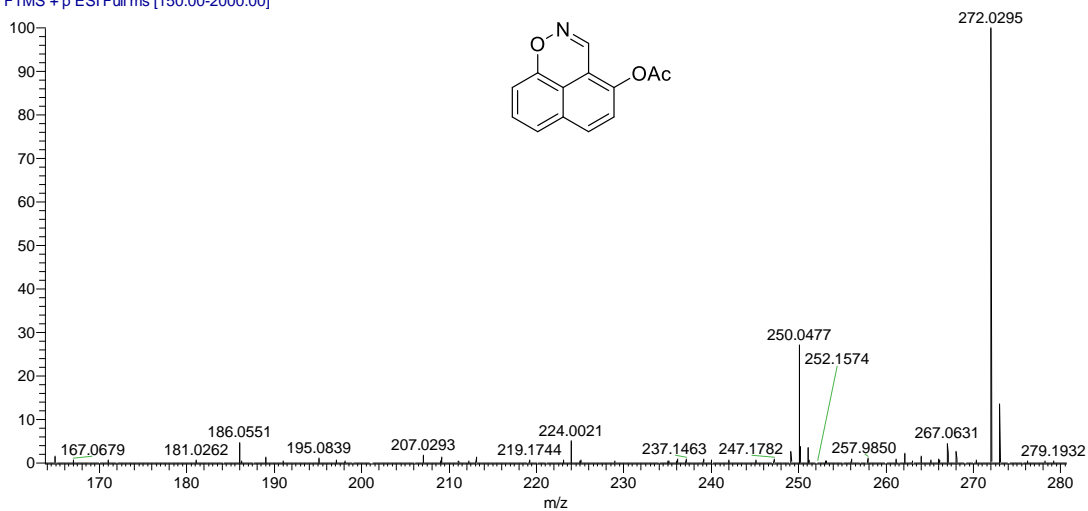

**Figure S17.** HRMS  $[\text{M}+\text{H}]^+$  of compound (15) using 0.1%  $\text{HCO}_2\text{H}$  in MeOH as solvent.

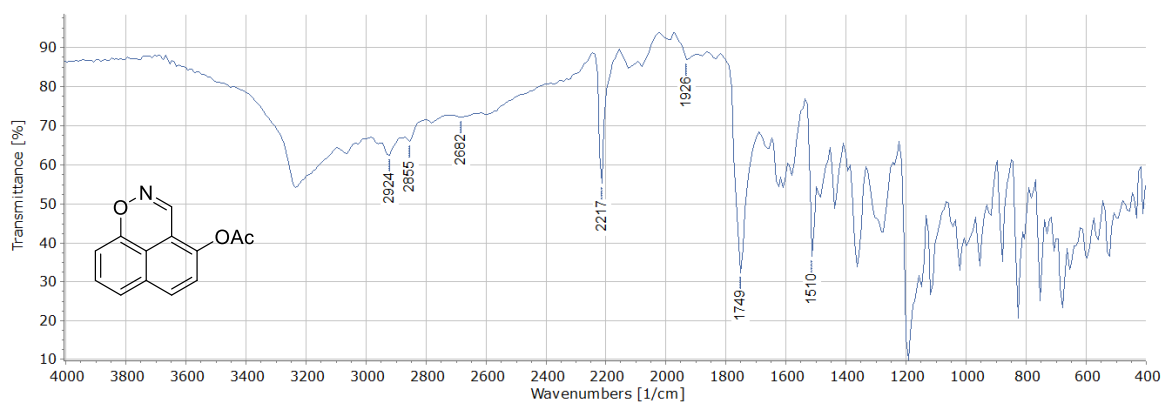

**Figure S18.** IR spectrum (solid) of compound (15).

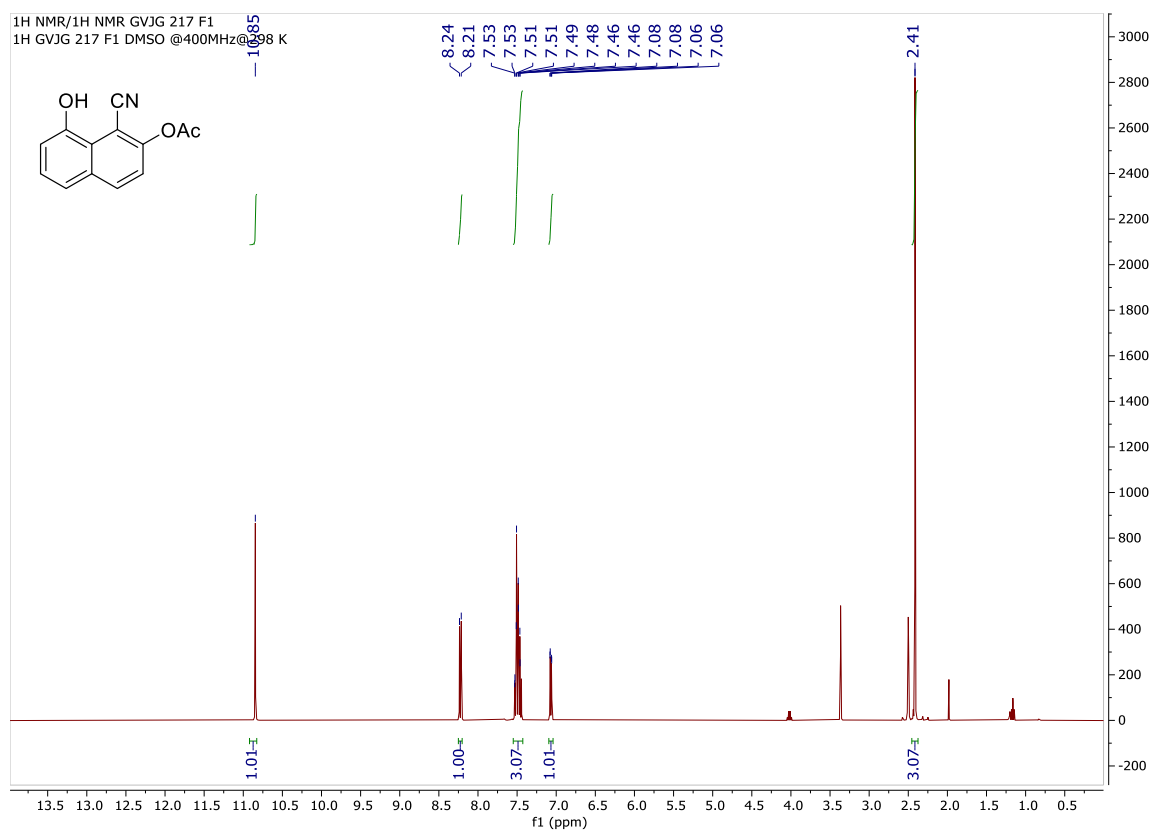

**Figure S19.** <sup>1</sup>H NMR (400 MHz, DMSO-*d*<sub>6</sub>) of compound (16).

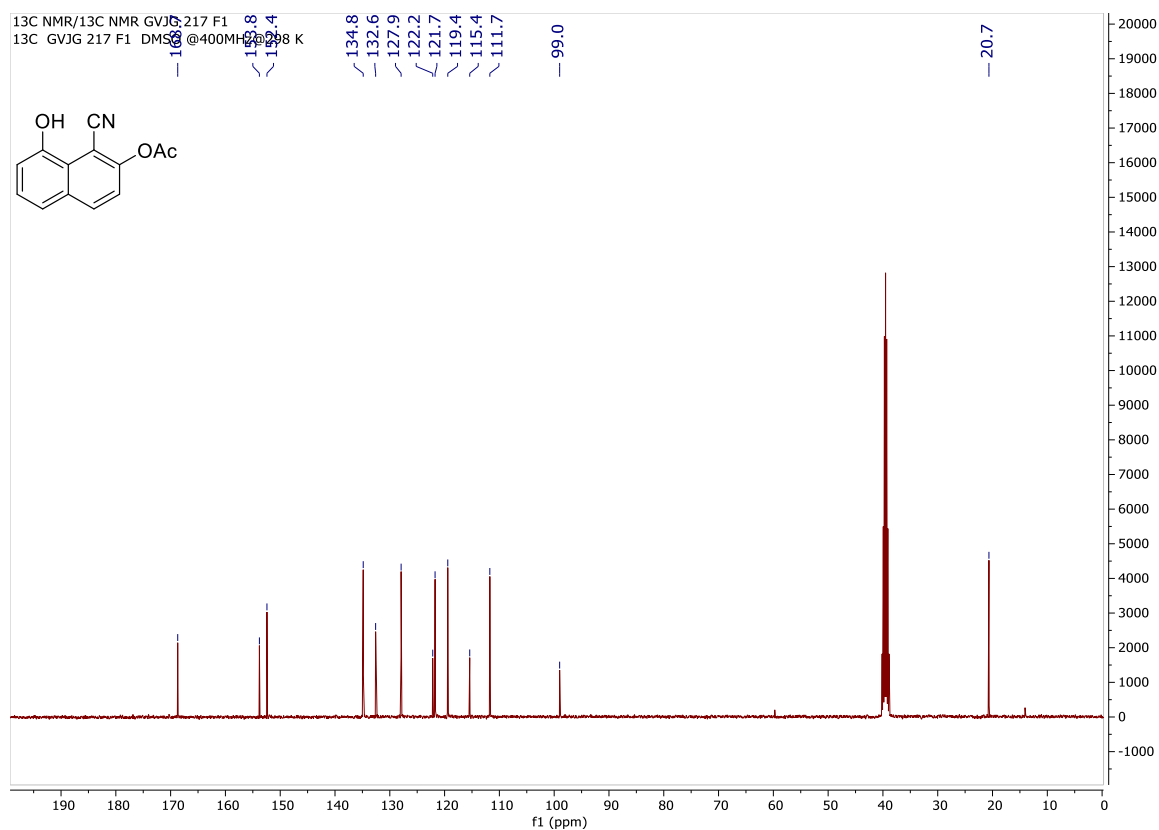

**Figure S20.**  $^{13}\text{C}$  NMR (100.6 MHz, DMSO- $d_6$ ) of compound (16).

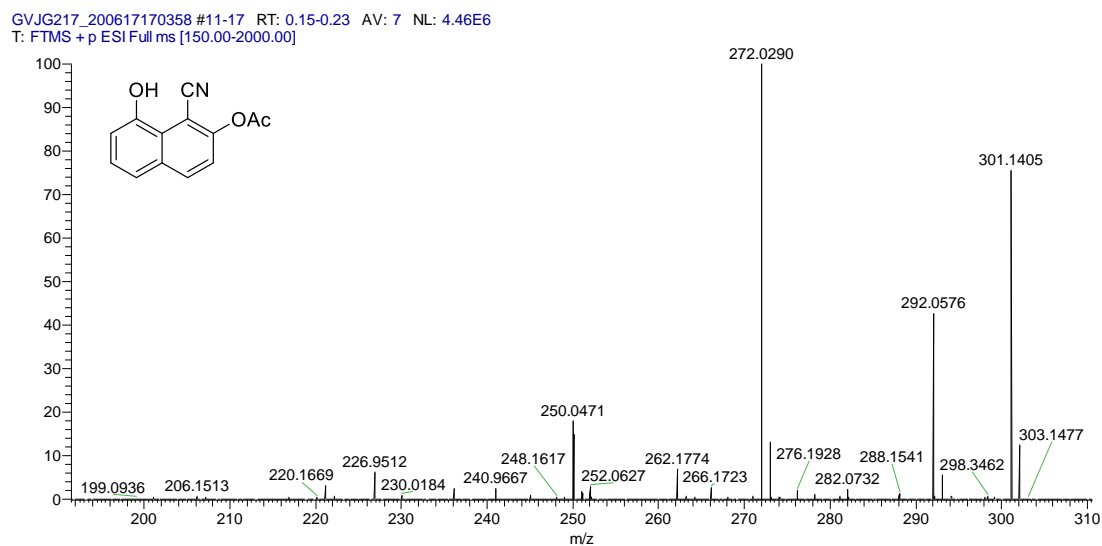

**Figure S21.** HRMS  $[\text{M}+\text{H}]^+$  of compound (16) using 0.1%  $\text{HCO}_2\text{H}$  in MeOH as solvent.

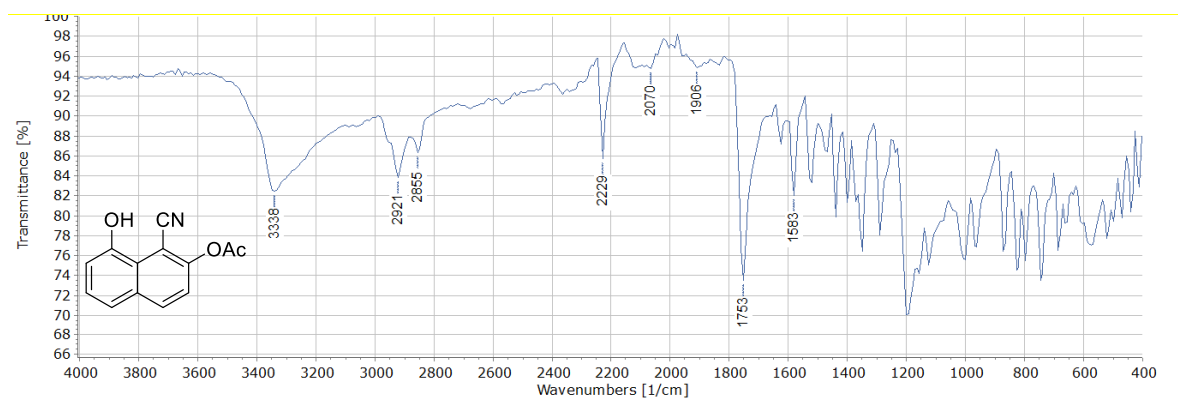

**Figure S22.** IR spectrum (solid) of compound (**16**).

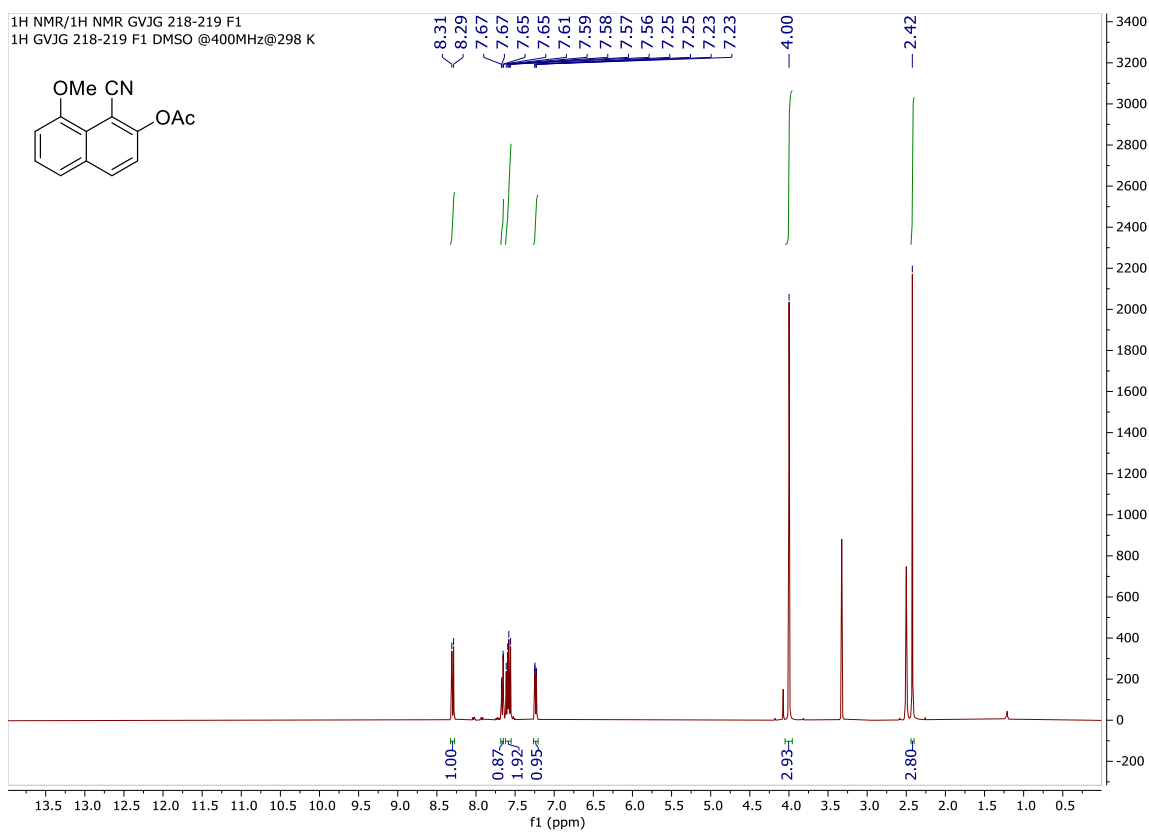

**Figure S23.**  $^1\text{H}$  NMR (400 MHz,  $\text{DMSO}-d_6$ ) of (**17**).

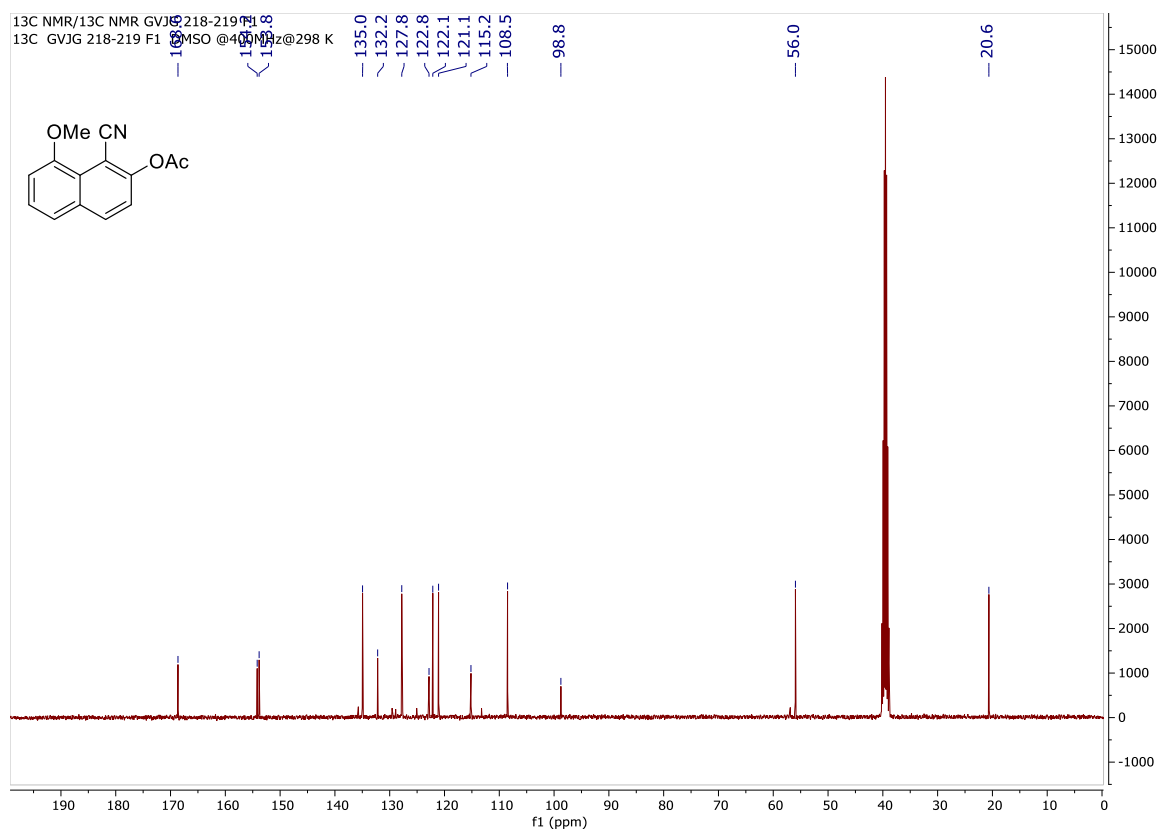

**Figure S24.**  $^{13}\text{C}$  NMR (100.6 MHz, DMSO- $d_6$ ) of (17).

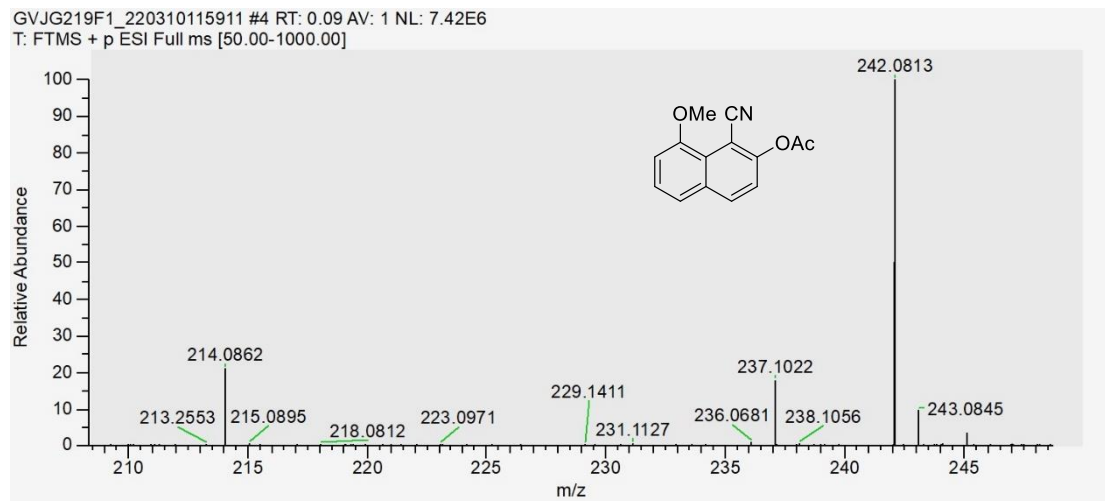

**Figure S25.** HRMS  $[\text{M}+\text{H}]^+$  of compound (17) using 0.1%  $\text{HCO}_2\text{H}$  in MeOH as solvent.

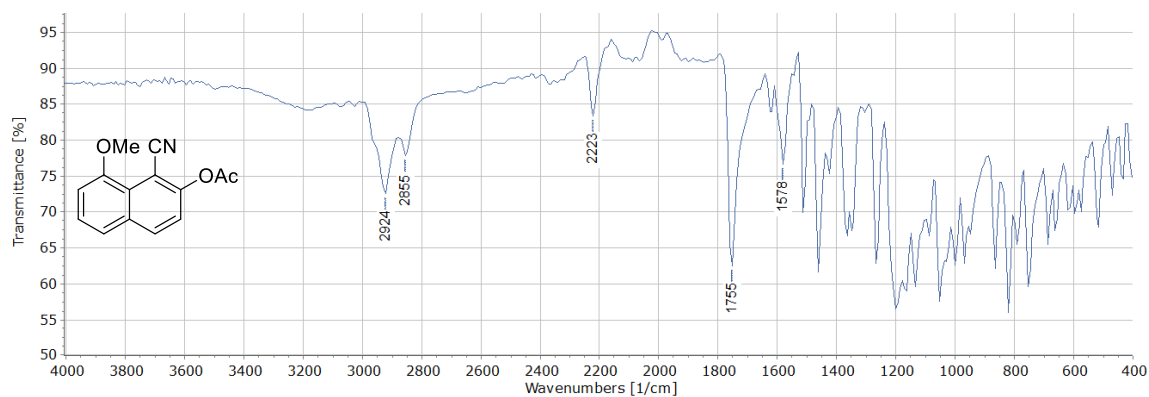

**Figure S26.** IR spectrum (solid) of **(17)**

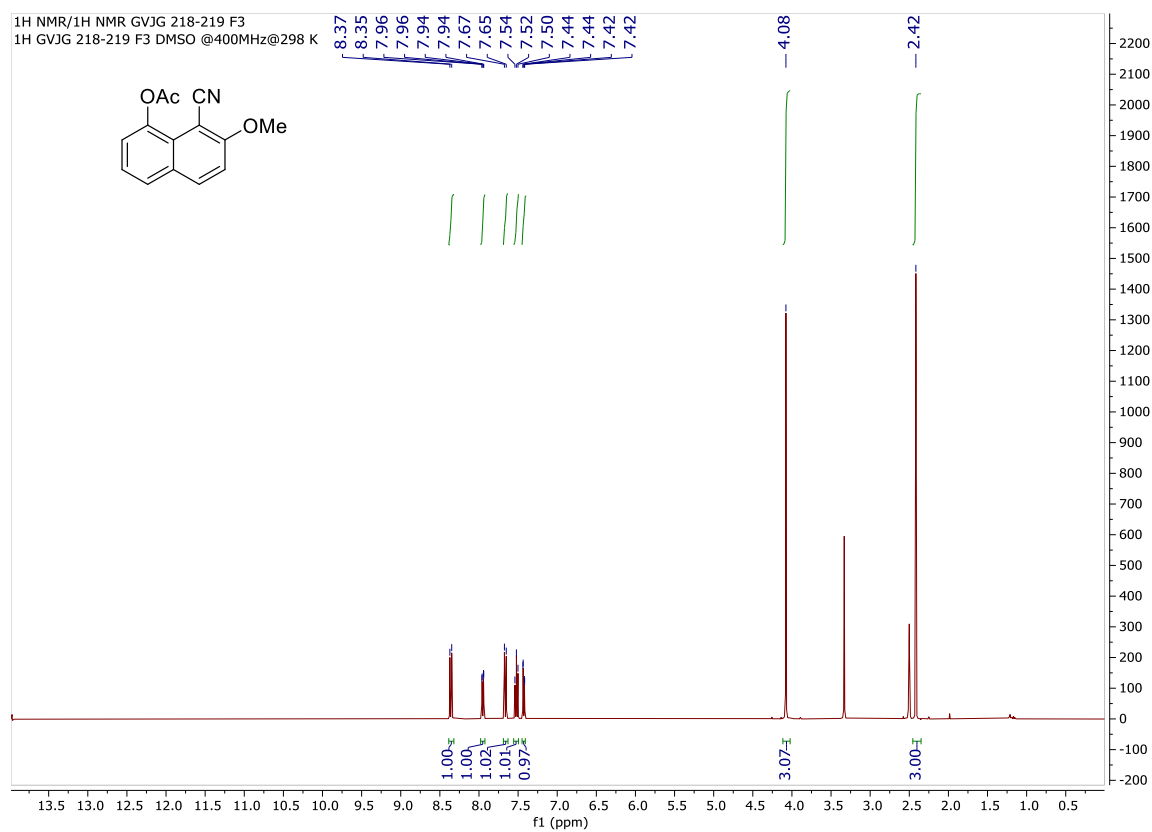

**Figure S27.**  $^1\text{H}$  NMR (400 MHz,  $\text{DMSO}-d_6$ ) of **(18)**.



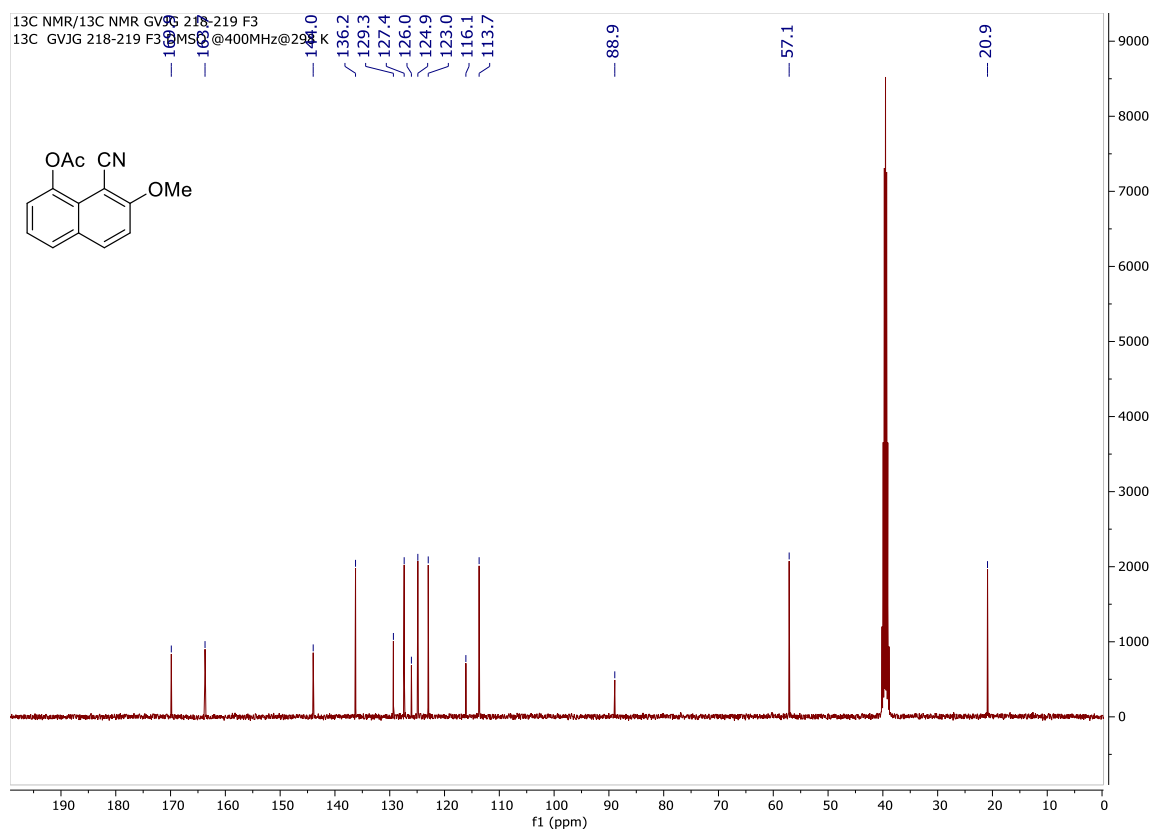

**Figure S28.**  $^{13}\text{C}$  NMR (100.6 MHz,  $\text{DMSO}-d_6$ ) of (18).

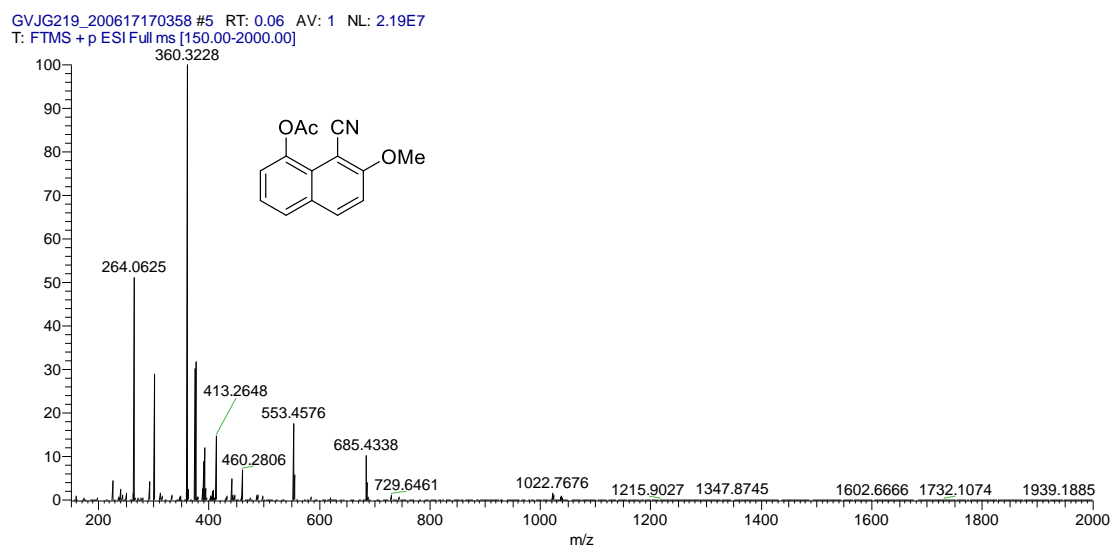

**Figure S29.** HRMS  $[\text{M}+\text{H}]^+$  of compound (18) using 0.1%  $\text{HCO}_2\text{H}$  in MeOH as solvent.

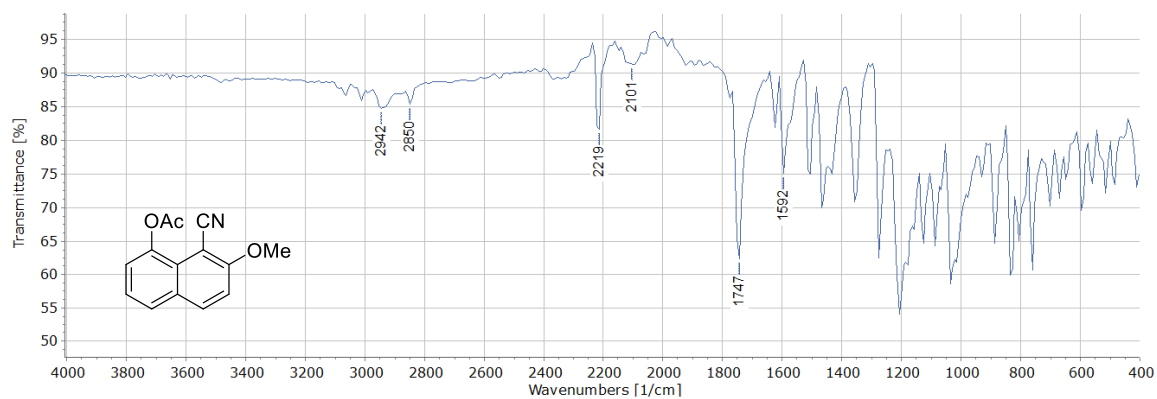

**Figure S30.** IR spectrum (solid) of (18).

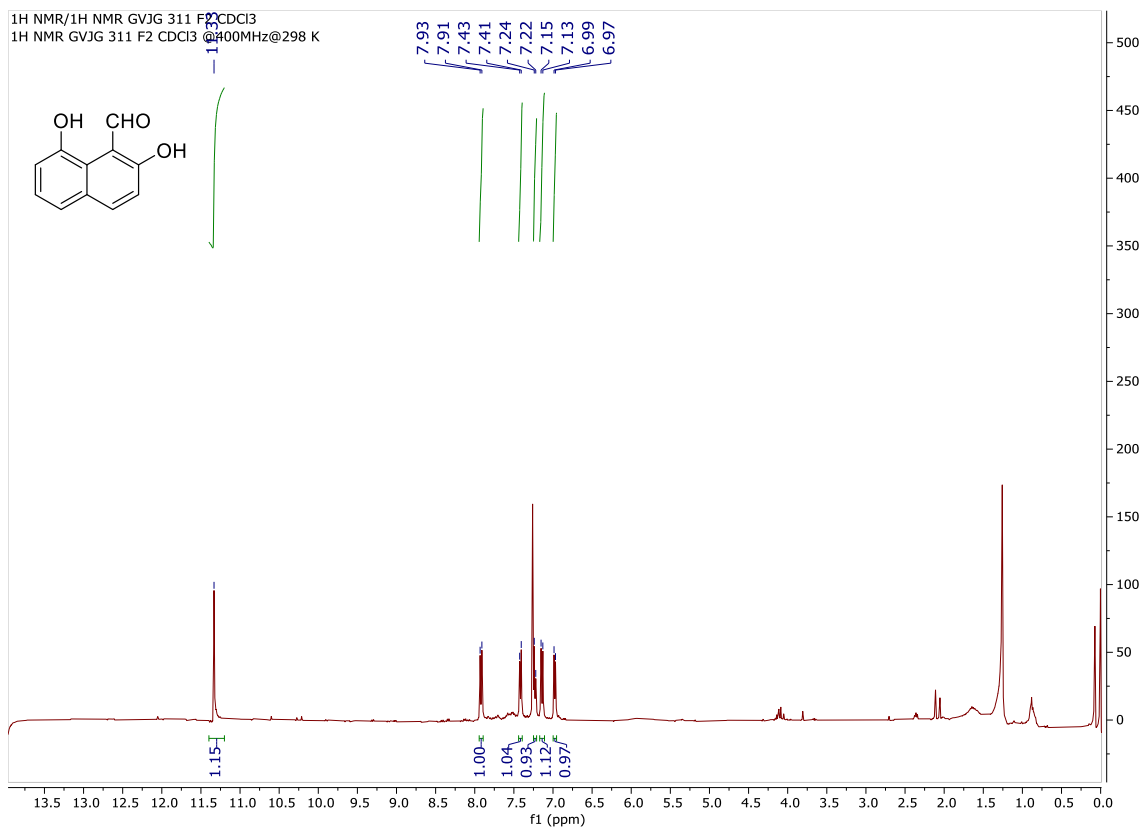

**Figure S31.** <sup>1</sup>H NMR (400 MHz, CDCl<sub>3</sub>) of (19).

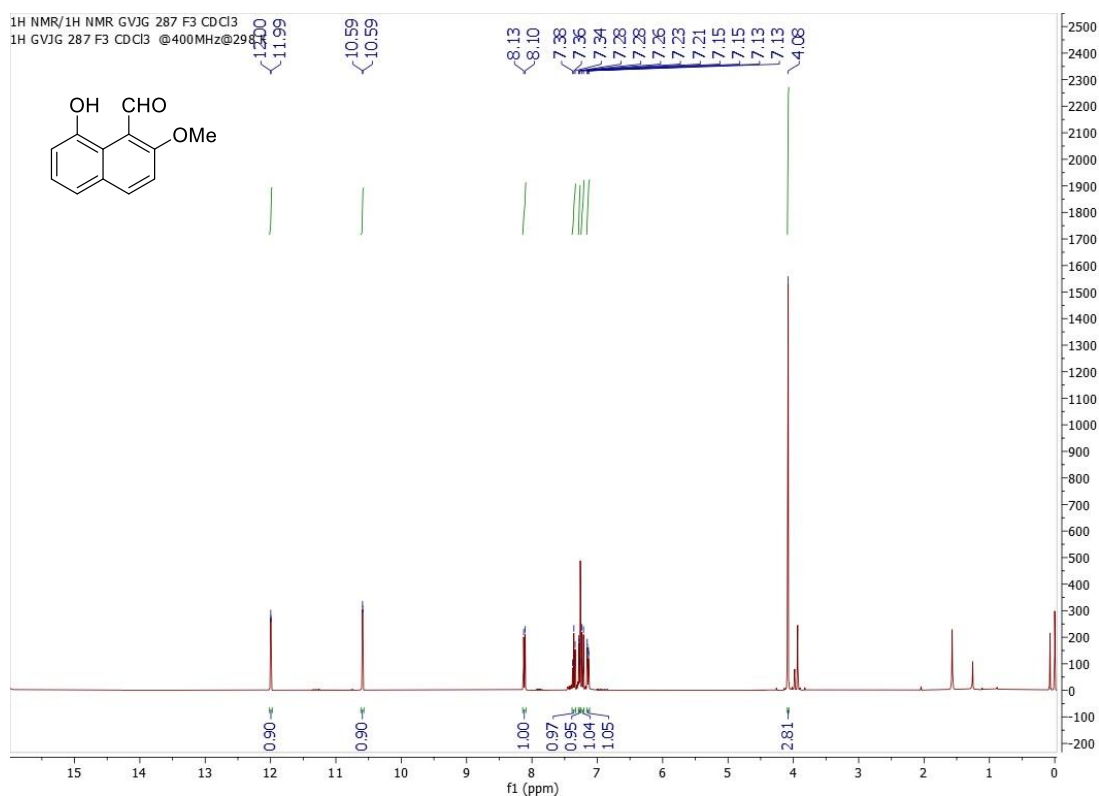

**Figure S32.**  $^1\text{H}$  NMR (400 MHz,  $\text{CDCl}_3$ ) of (20).

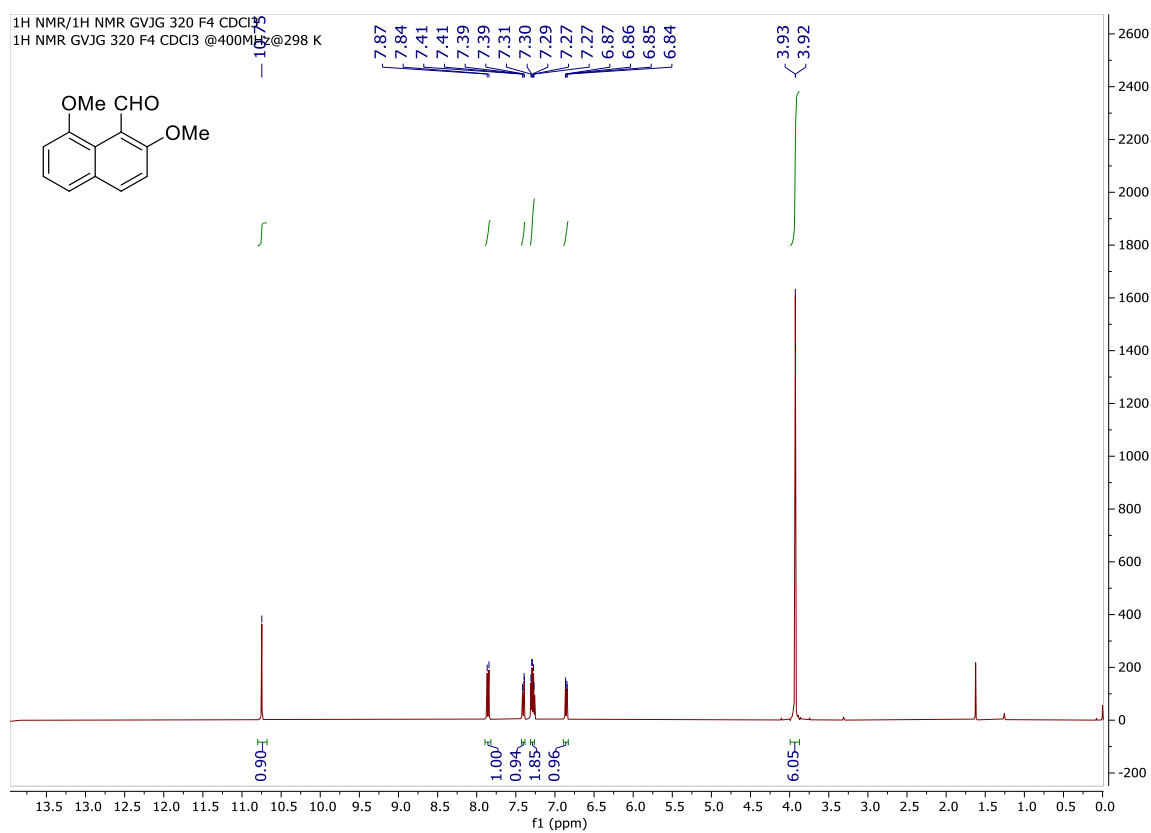

**Figure S33.**  $^1\text{H}$  NMR (400 MHz,  $\text{CDCl}_3$ ) of (21).

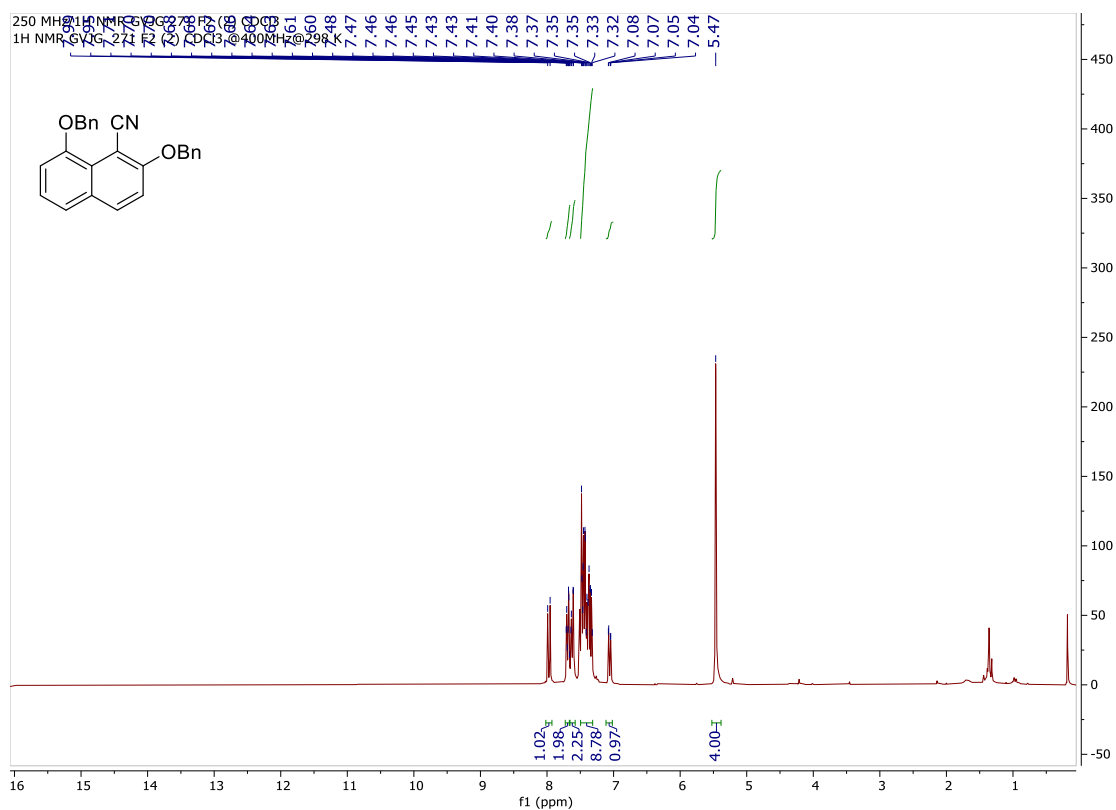

**Figure S34.** <sup>1</sup>H NMR (400 MHz, CDCl<sub>3</sub>) of (22).

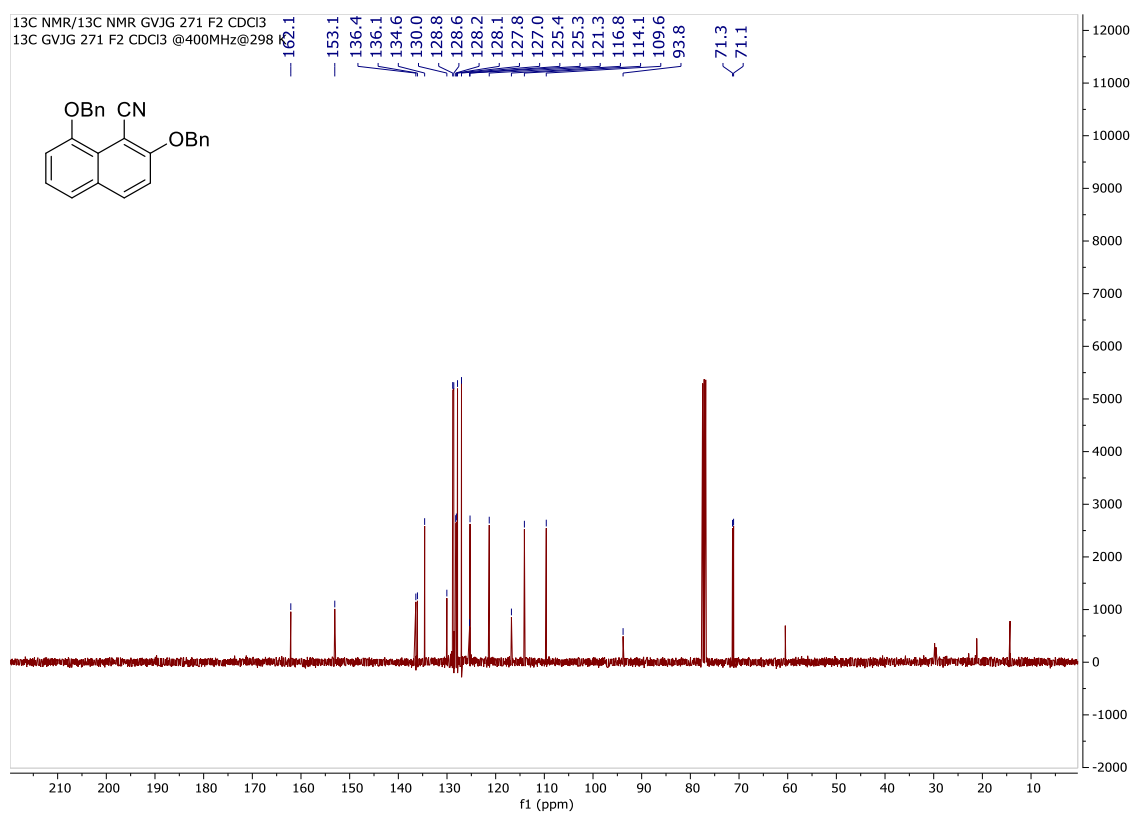

**Figure S35.** <sup>13</sup>C NMR (100.6 MHz, CDCl<sub>3</sub>) of (22).

GVJG271F2\_new\_220310115911 #4 RT: 0.05 AV: 1 NL: 1.06E7  
T: FTMS + p ESI Full ms [150.00-2000.00]

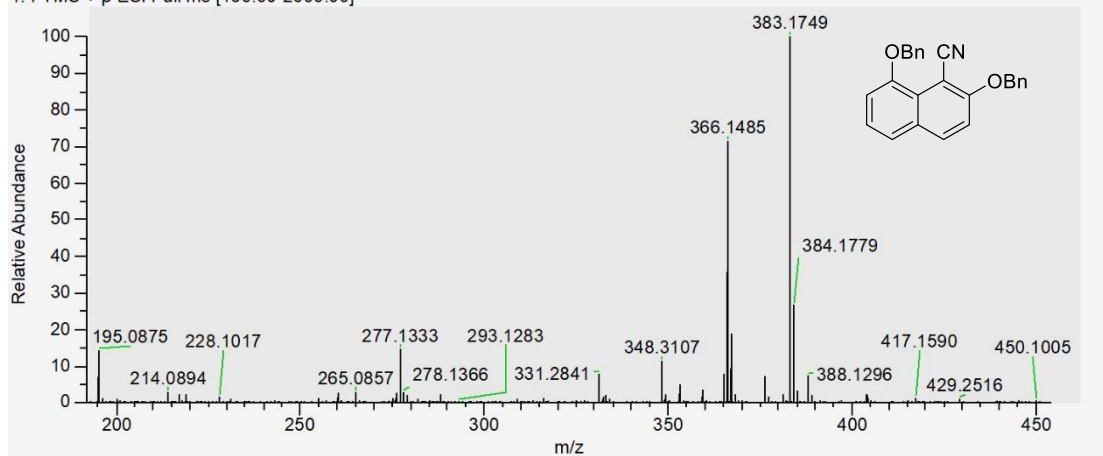

**Figure S36.** HRMS  $[M+H]^+$  of compound (22) using 0.1%  $HCO_2H$  in MeOH as solvent.

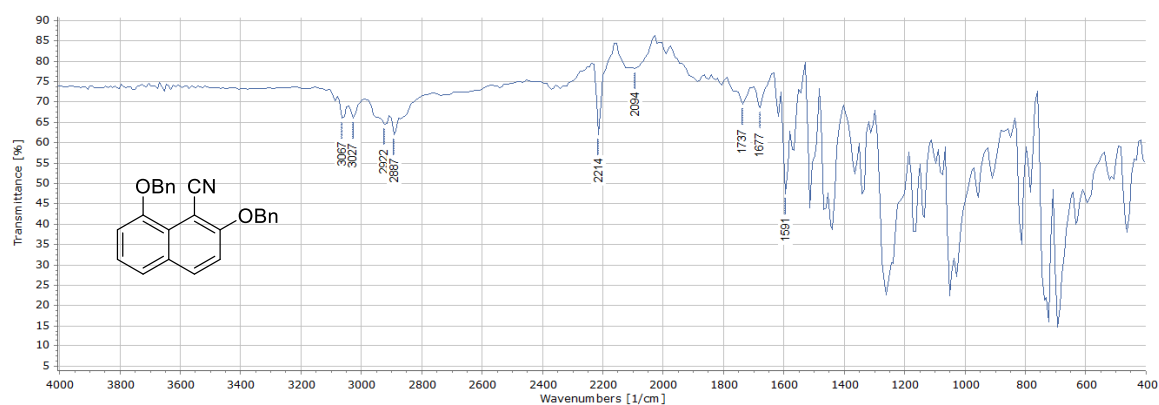

**Figure S37.** IR spectrum (solid) of (22).

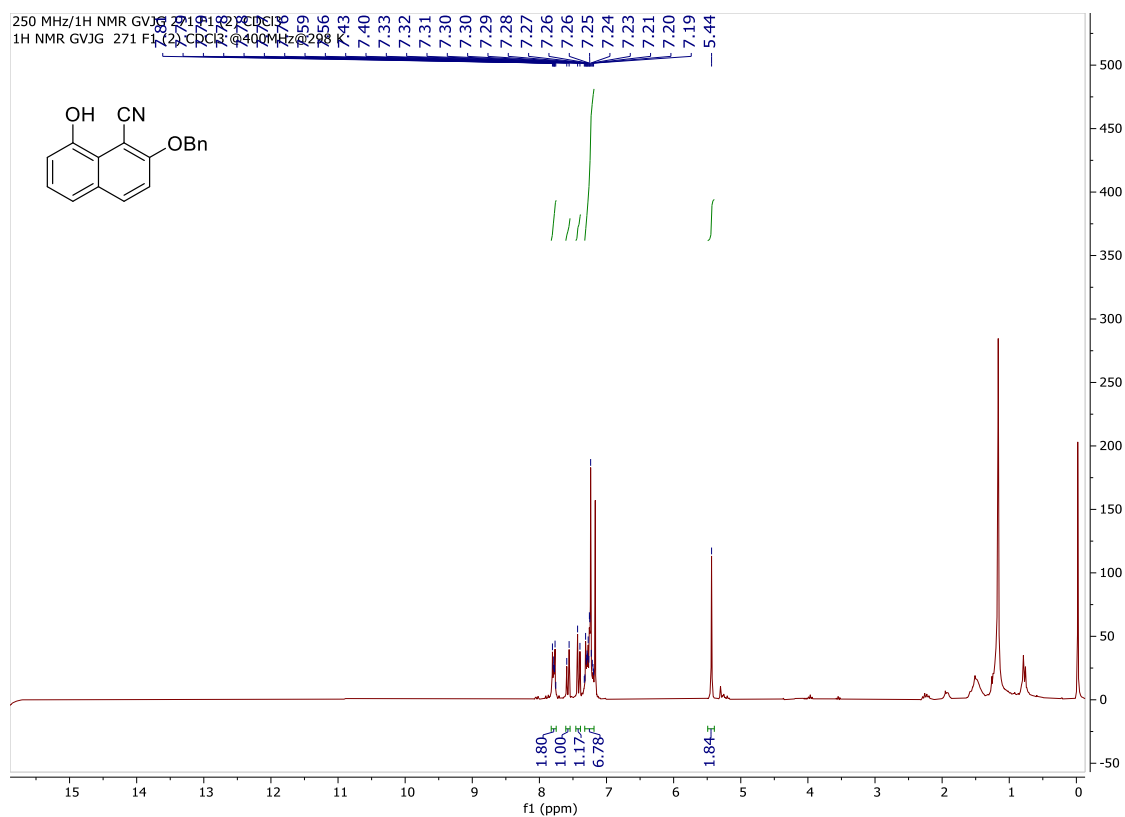

**Figure S38.** <sup>1</sup>H NMR (400 MHz, CDCl<sub>3</sub>) of (23).

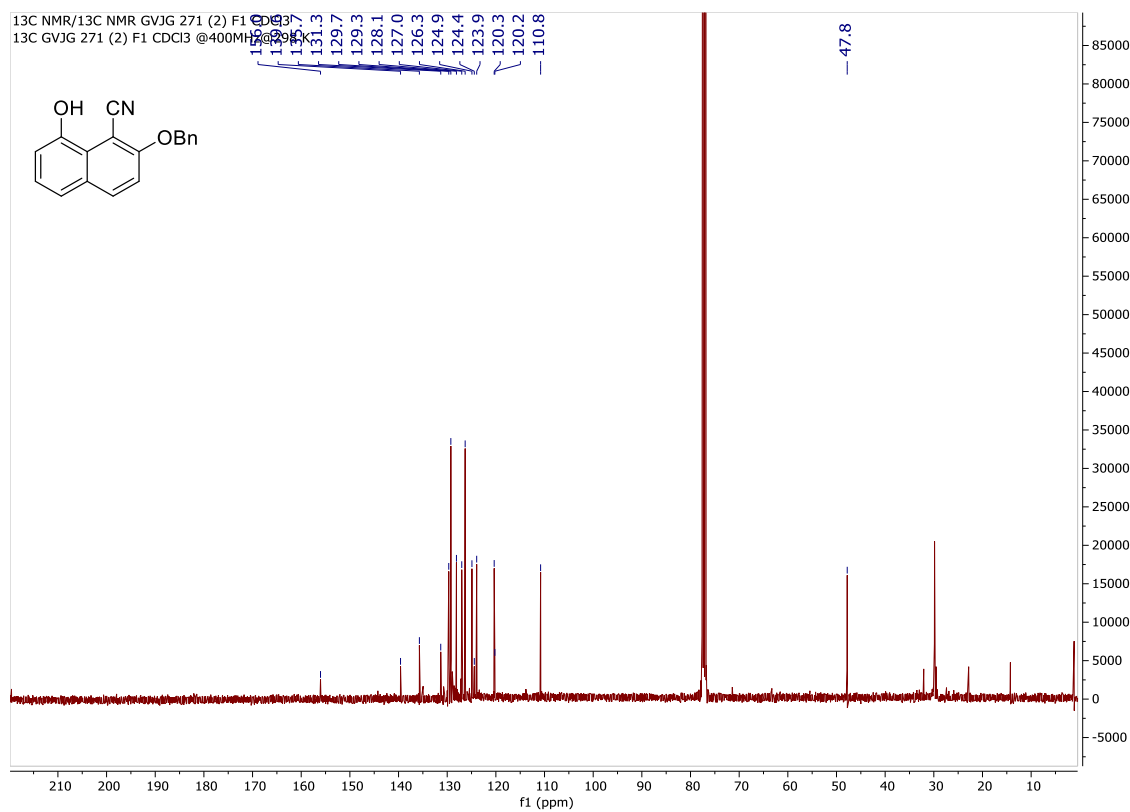

**Figure S39.** <sup>13</sup>C NMR (100.6 MHz, CDCl<sub>3</sub>) of (23).

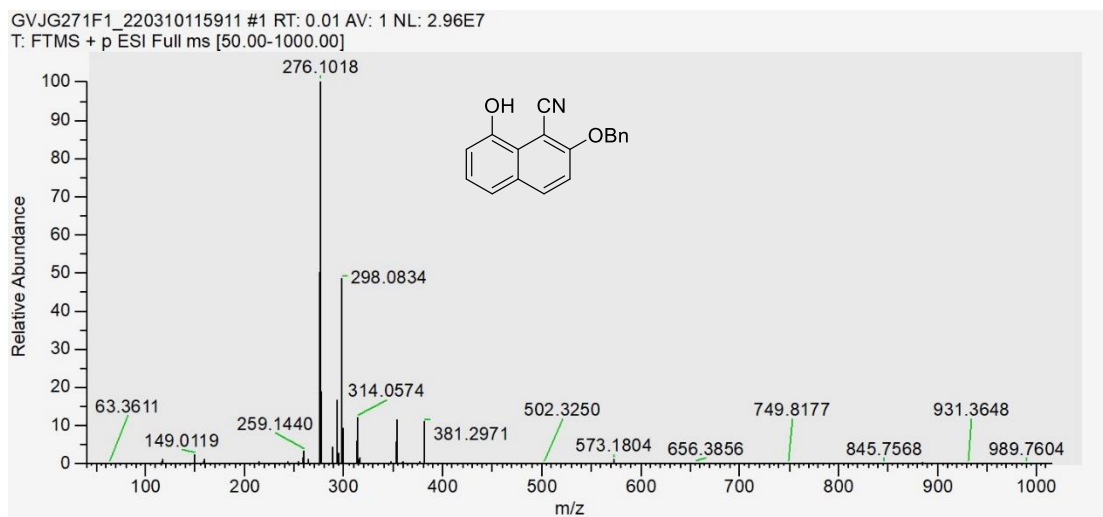

**Figure S40.** HRMS  $[M+H]^+$  of compound (**23**) using 0.1%  $\text{HCO}_2\text{H}$  in MeOH as solvent.

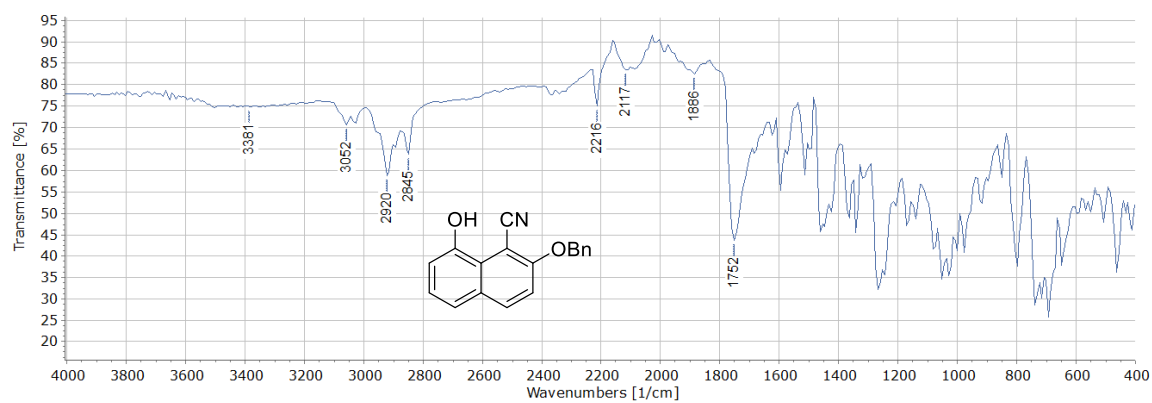

**Figure S41.** IR spectrum (solid) of (**23**).

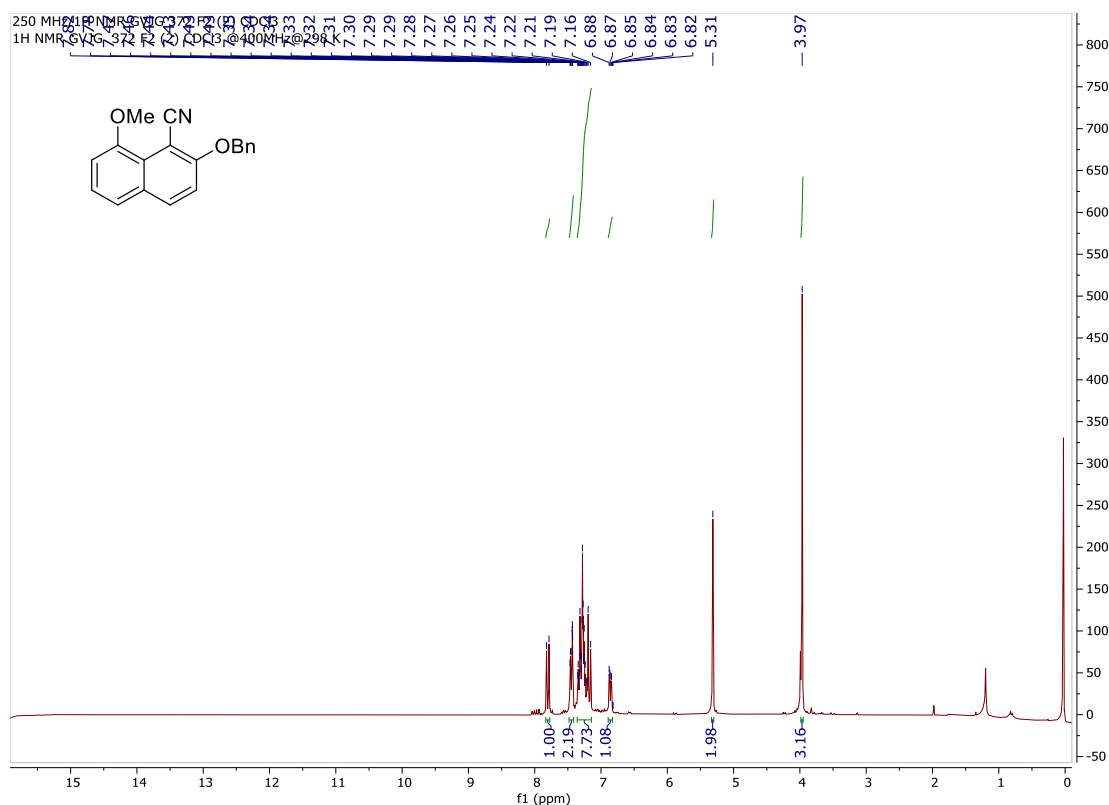

**Figure S42.** <sup>1</sup>H NMR (400 MHz, CDCl<sub>3</sub>) of (24).

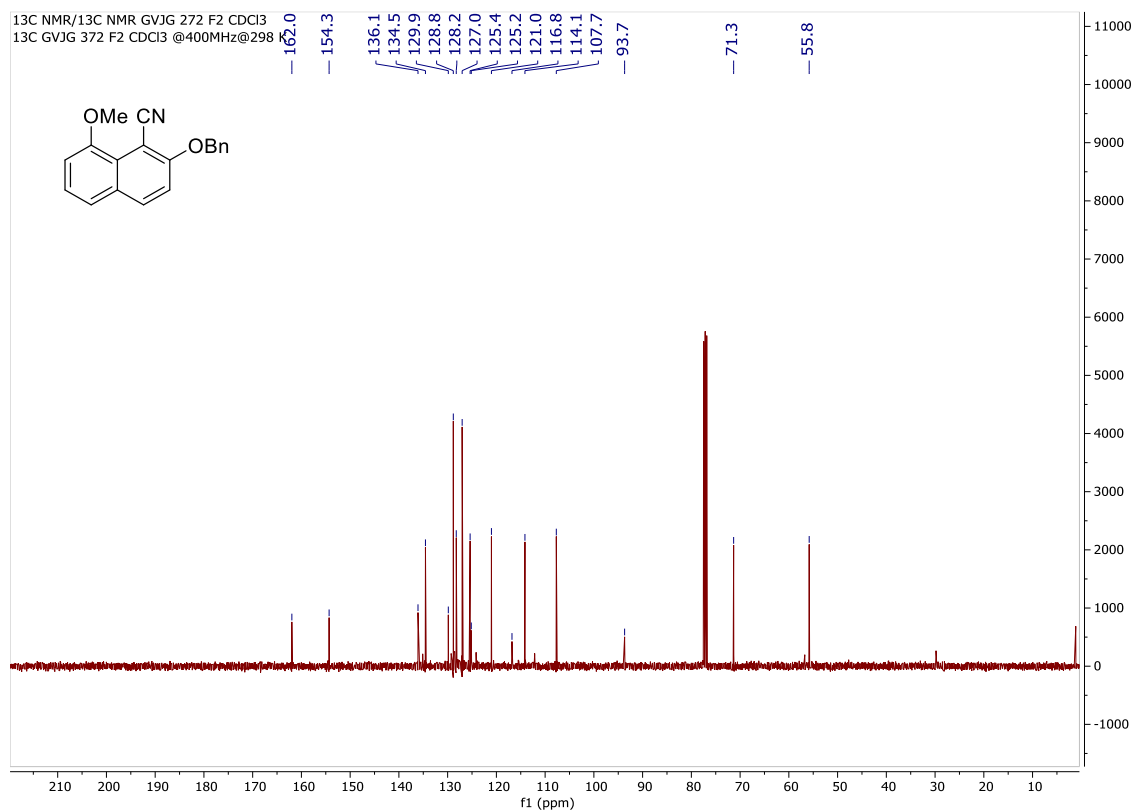

**Figure S43.** <sup>13</sup>C NMR (100.6 MHz, CDCl<sub>3</sub>) of (24).



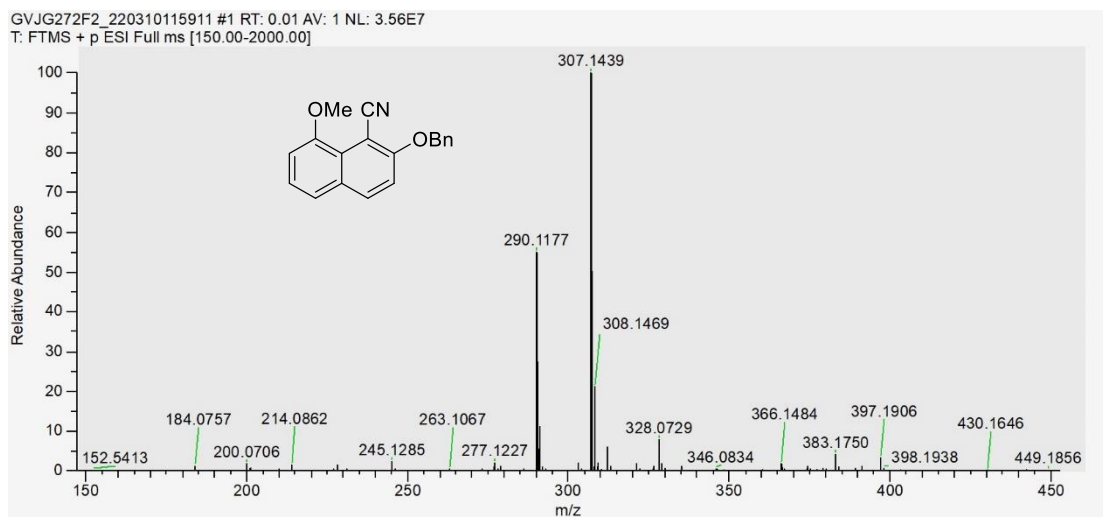

**Figure S44.** HRMS  $[M+H]^+$  of compound (24) using 0.1%  $\text{HCO}_2\text{H}$  in MeOH as solvent.

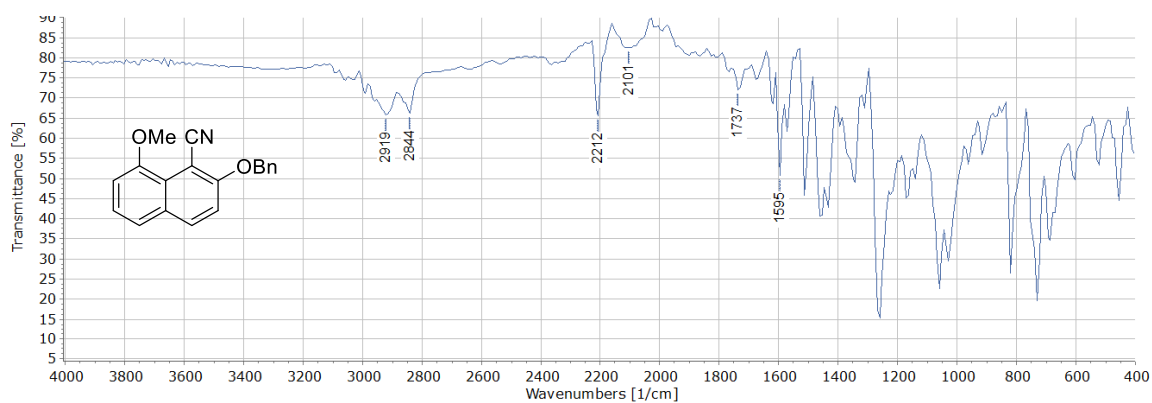

**Figure S45.** IR spectrum (solid state) of (24).

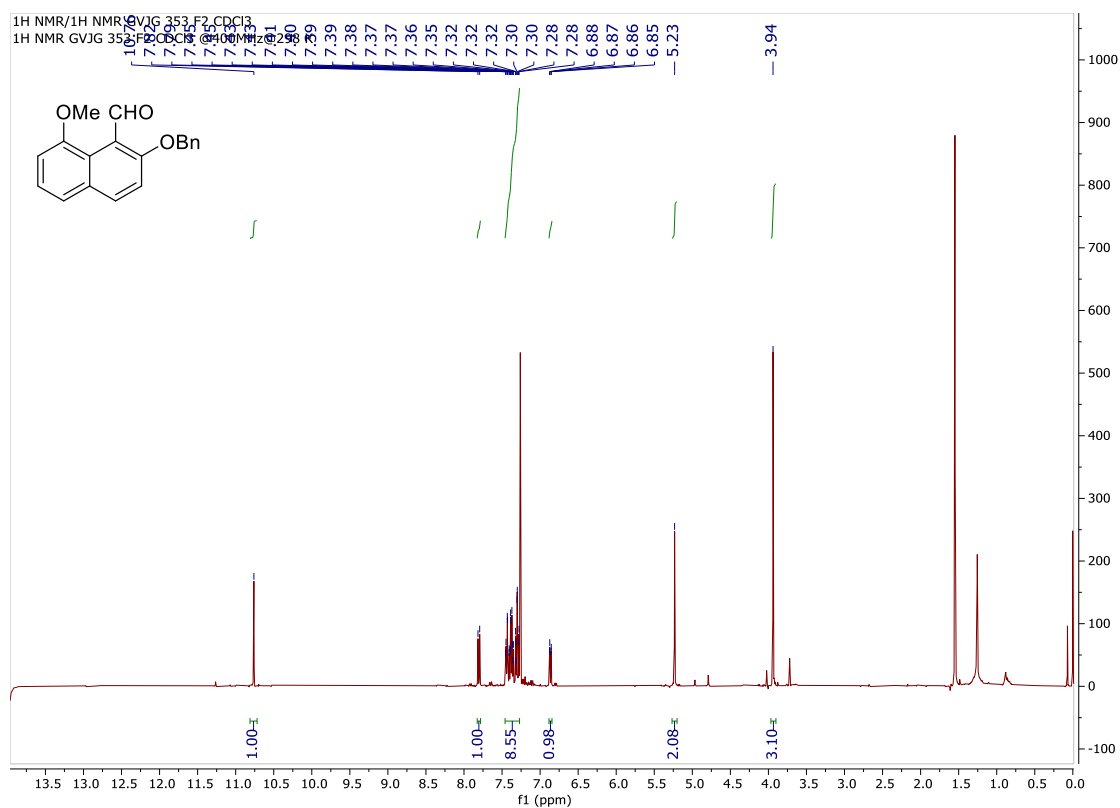

**Figure S46.** <sup>1</sup>H NMR (400 MHz, CDCl<sub>3</sub>) of (25).

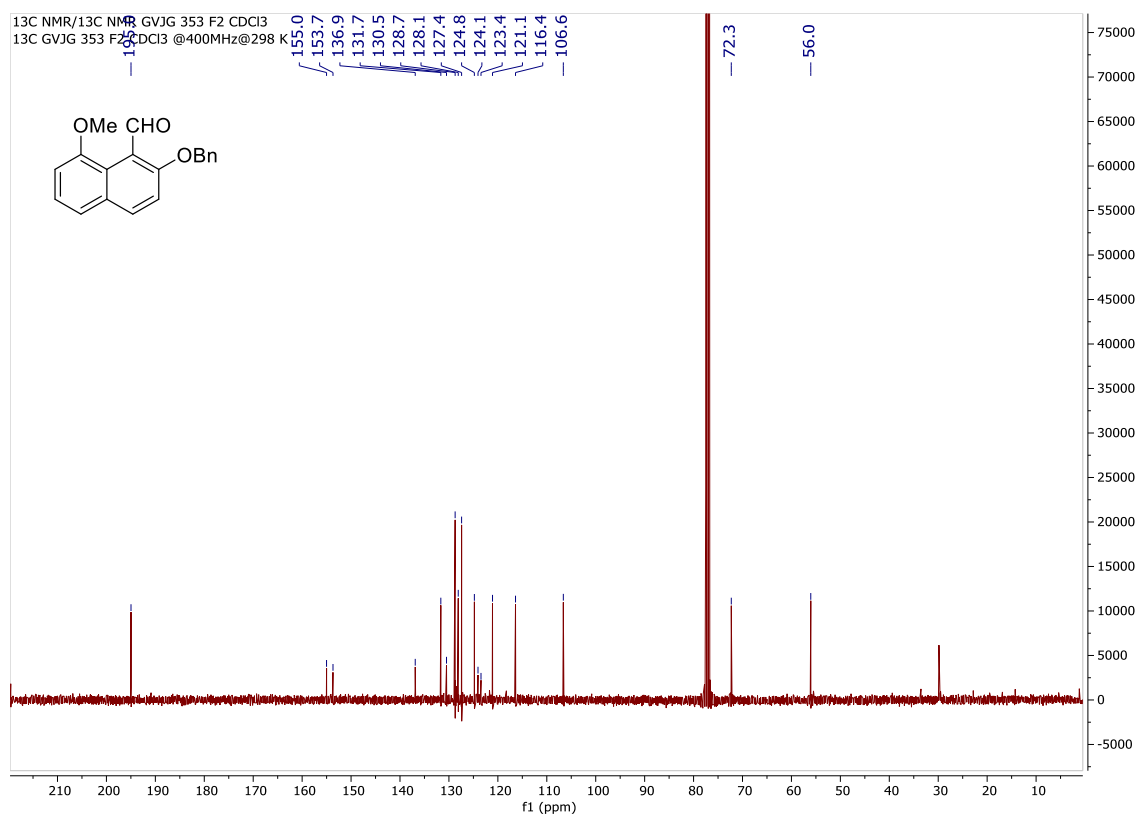

**Figure S47.** <sup>13</sup>C NMR [100.6 MHz, CDCl<sub>3</sub>] of (25).

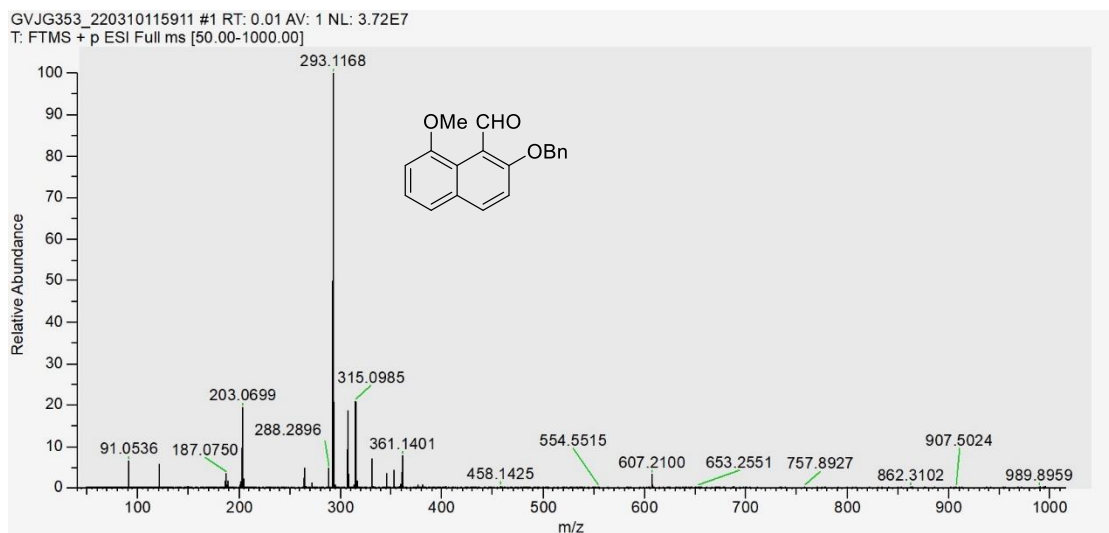

**Figure S48.** HRMS  $[M+H]^+$  of compound (25) using 0.1%  $\text{HCO}_2\text{H}$  in MeOH as solvent.

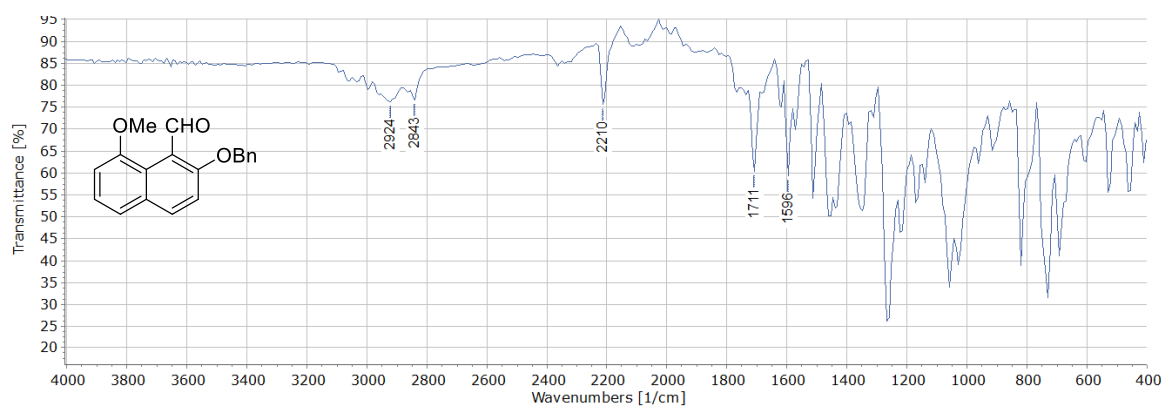

**Figure S49.** IR spectrum (solid state) of (25).

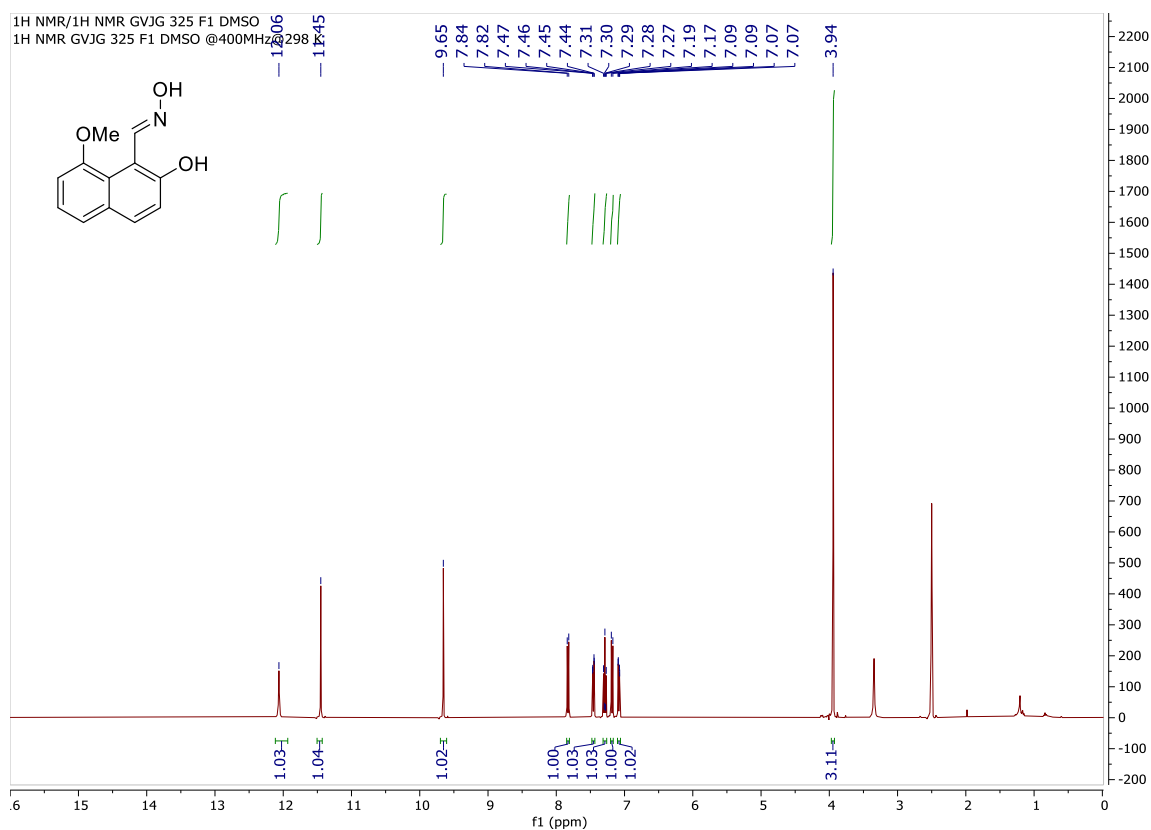

**Figure S50.**  $^1\text{H}$  NMR (400 MHz,  $\text{DMSO}-d_6$ ) of (6).

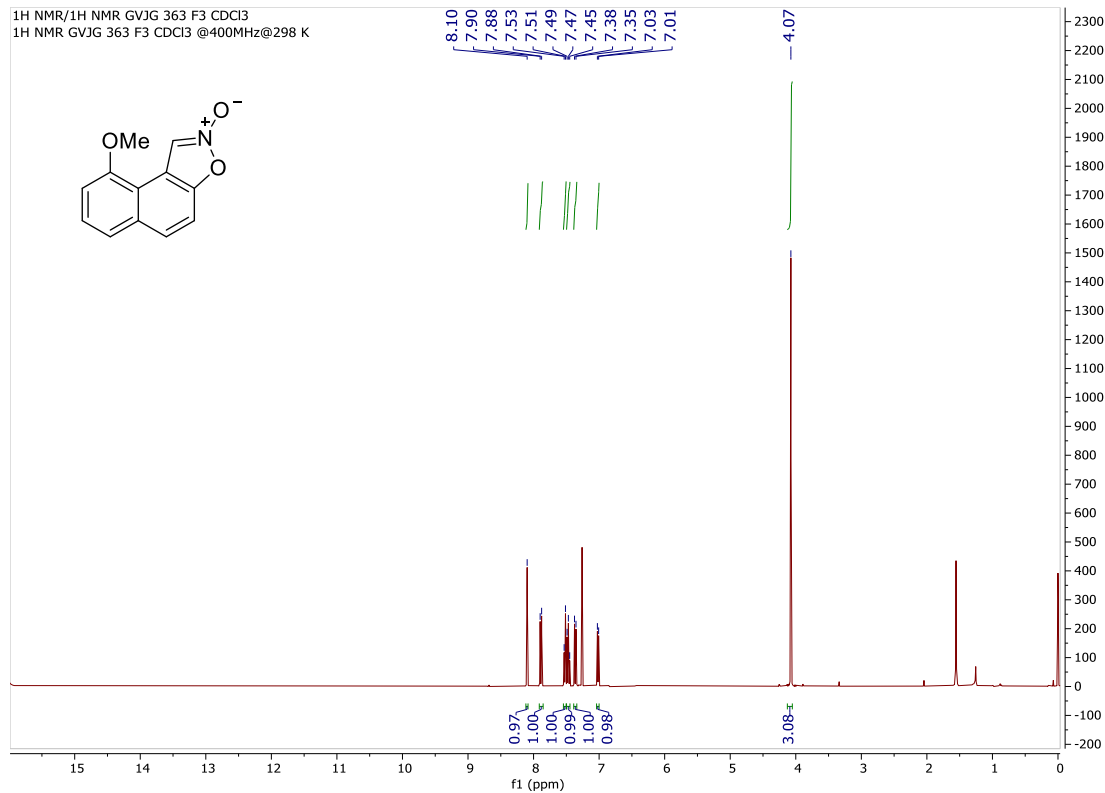

**Figure S51.**  $^1\text{H}$  NMR (400 MHz,  $\text{CDCl}_3$ ) of (8).

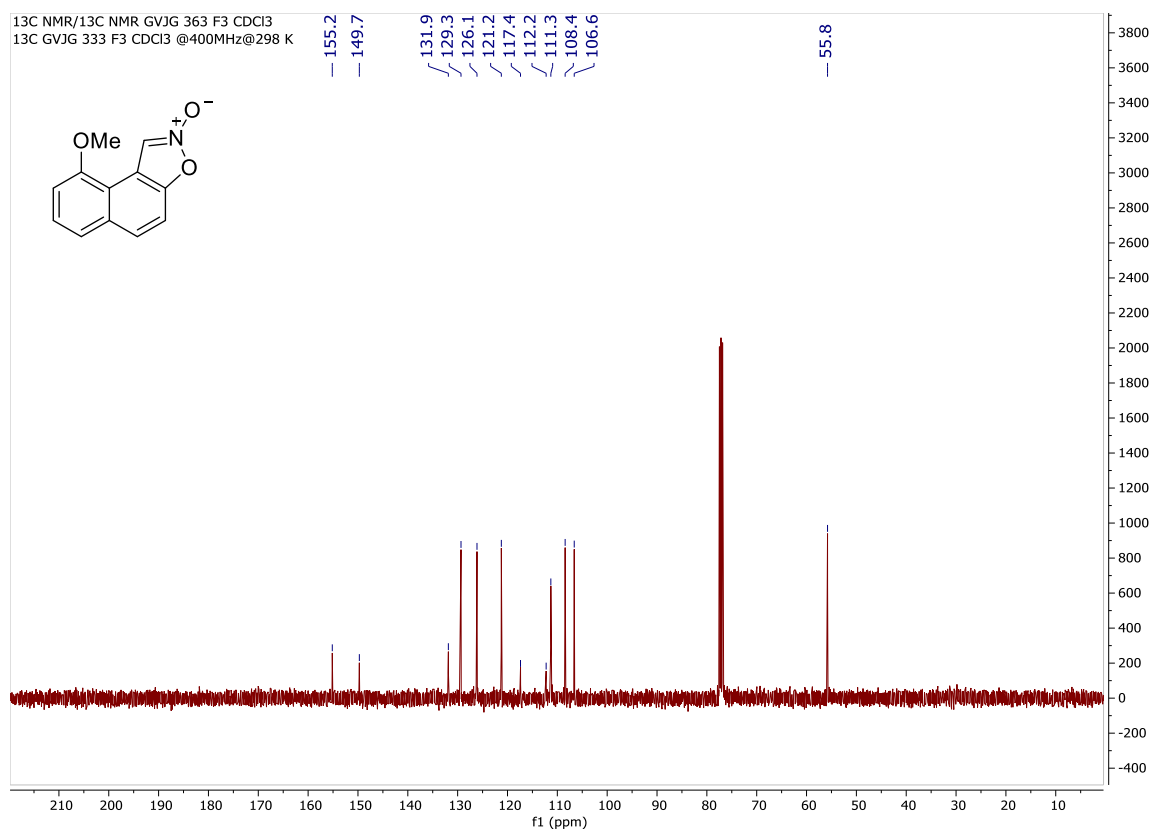

**Figure S52.**  $^{13}\text{C}$  NMR [100.6 MHz,  $\text{CDCl}_3$ ] of (8).

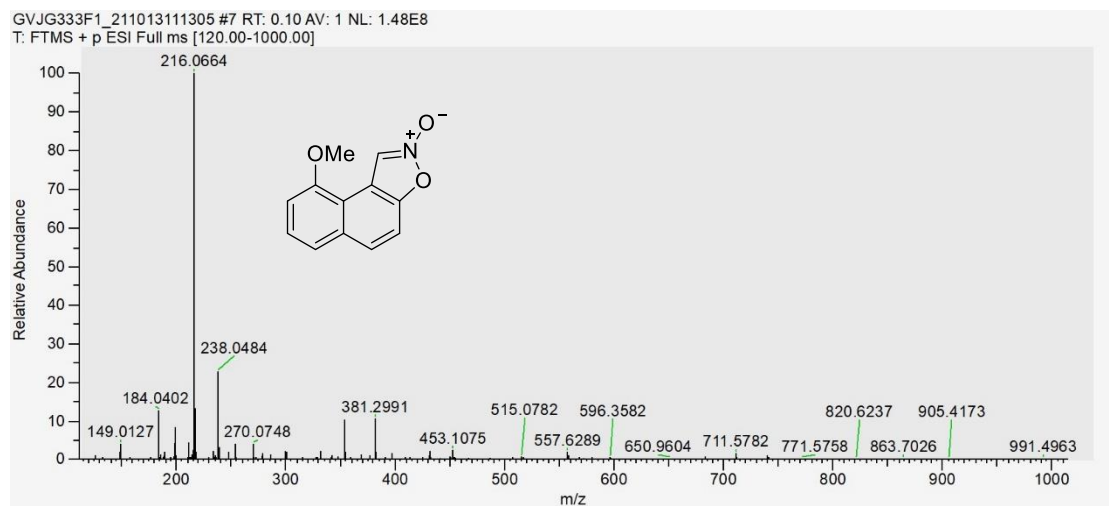

**Figure S53.** HRMS  $[\text{M}+\text{H}]^+$  of compound (8) using 0.1%  $\text{HCO}_2\text{H}$  in MeOH as solvent.

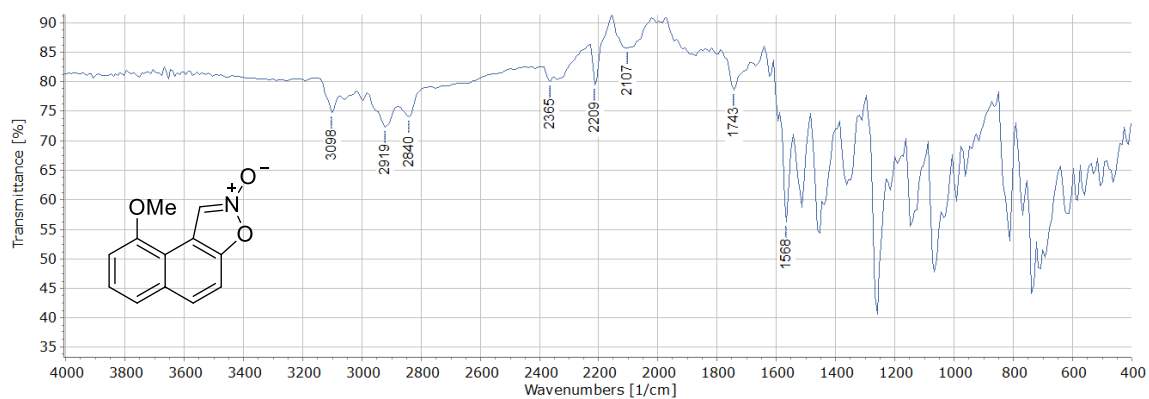

**Figure S54.** IR spectrum of (8).

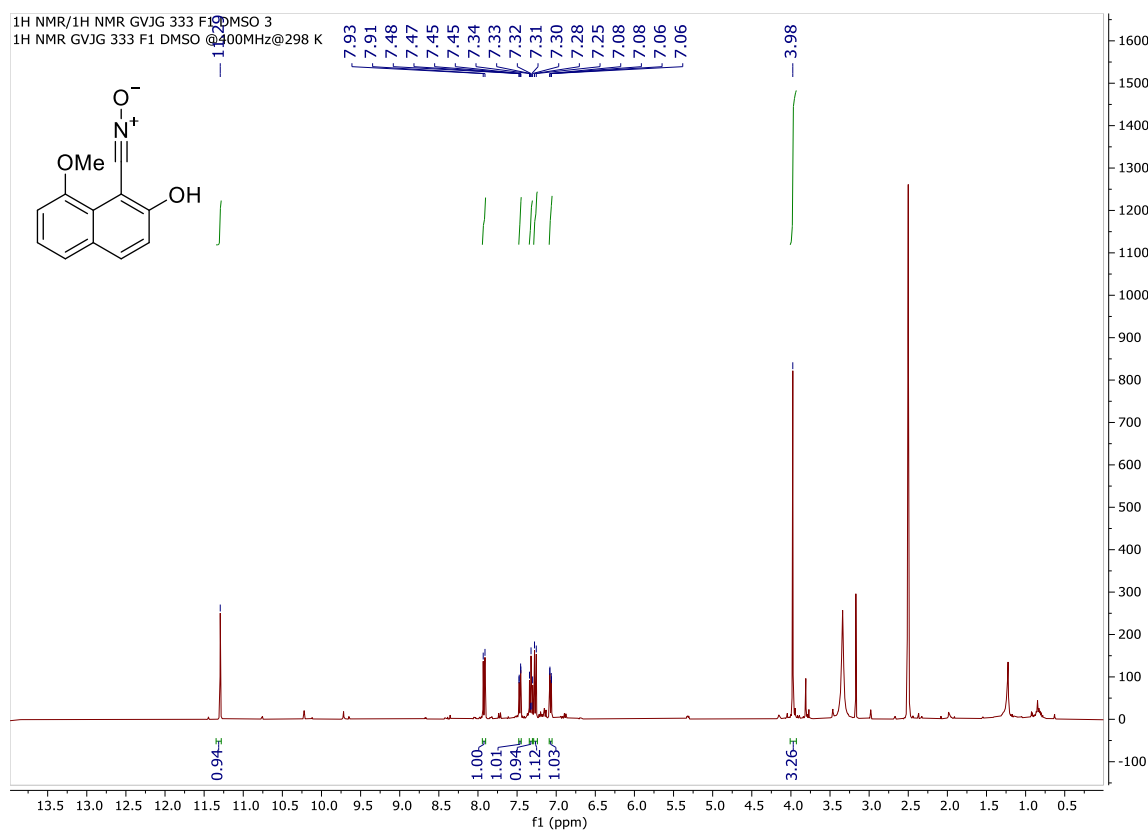

**Figure S55.** <sup>1</sup>H NMR (400 MHz, DMSO-*d*<sub>6</sub>) of (9).

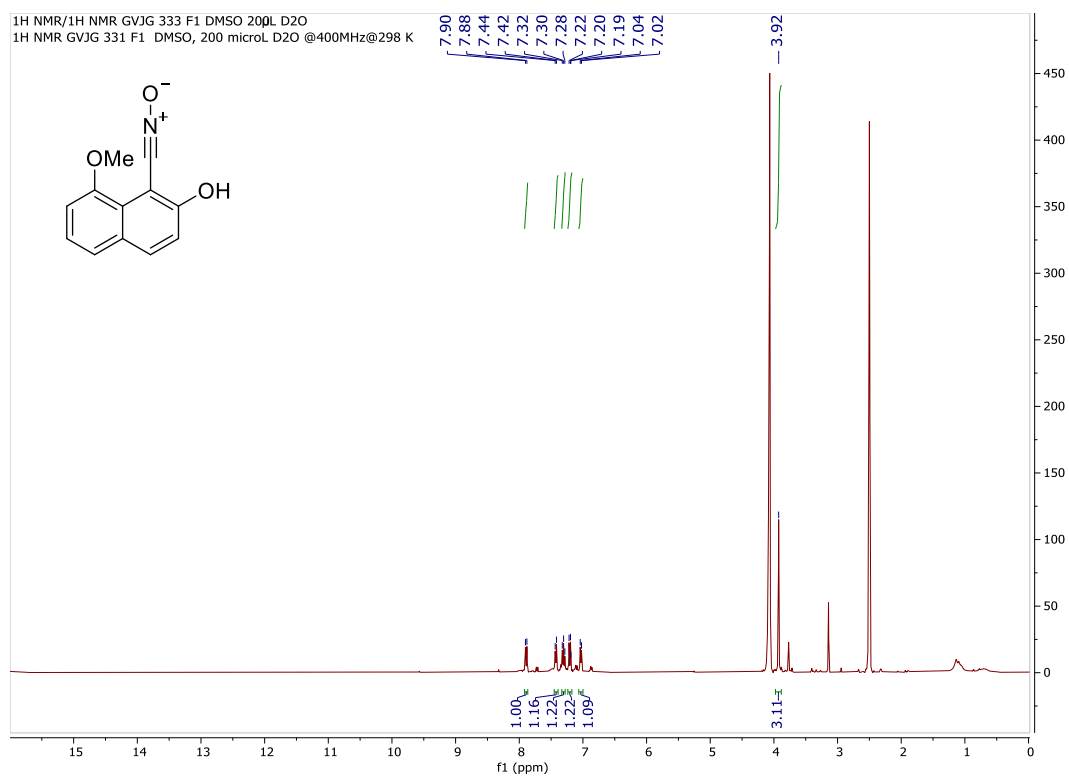

**Figure S56.** <sup>1</sup>H NMR (400 MHz, DMSO-*d*<sub>6</sub> + D<sub>2</sub>O) of (**9**).

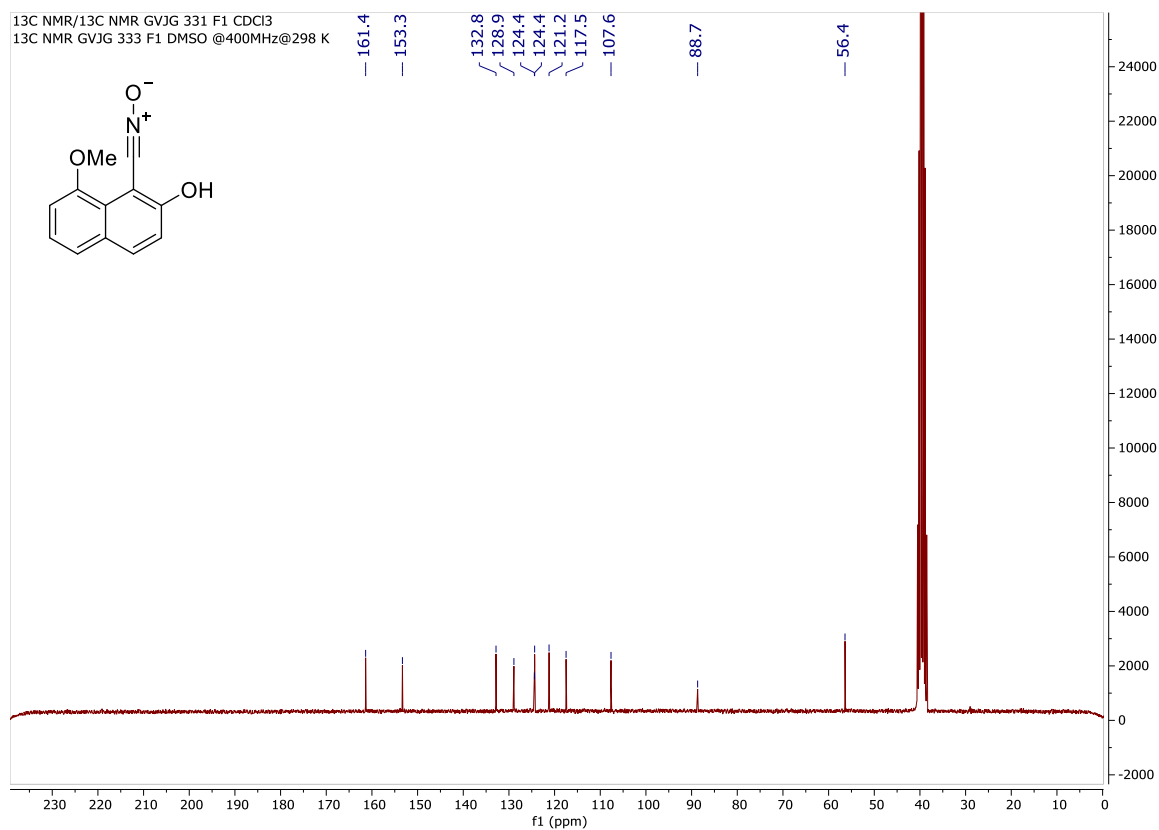

**Figure S57.** <sup>13</sup>C NMR [100.6 MHz, DMSO-*d*<sub>6</sub>] of (**9**).

GVJG333f1\_9rt\_210721103752 #37 RT: 0.52 AV: 1 NL: 1.33E7  
T: FTMS + p ESI Full ms [200.00-500.00]

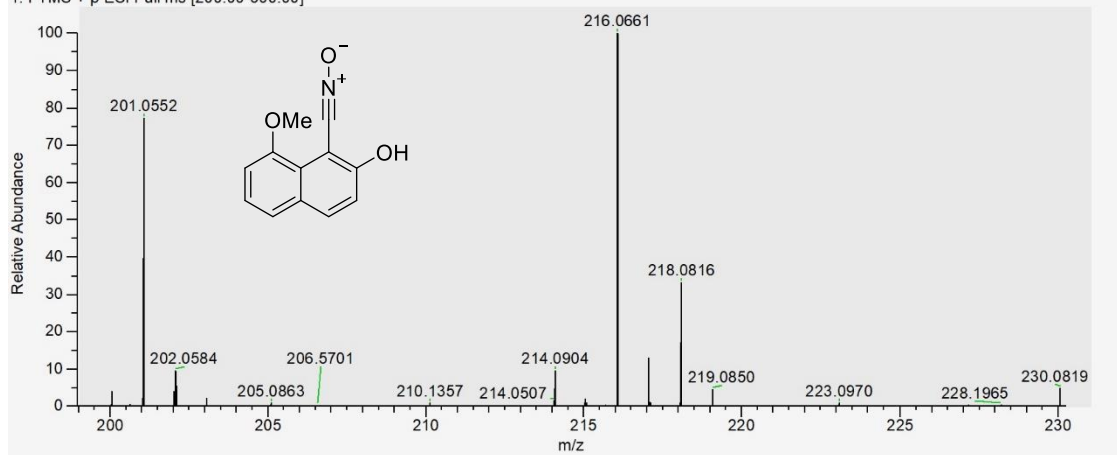

**Figure S58.** HRMS  $[M+H]^+$  of compound (9) in DMSO- $d_6$  using 0.1% HCO<sub>2</sub>H in MeOH as solvent.

1H NMR/1H NMR GVJG 333 F1 DMSO  
1H NMR GVJG 333 F1 DMSO @400MHz@298 K

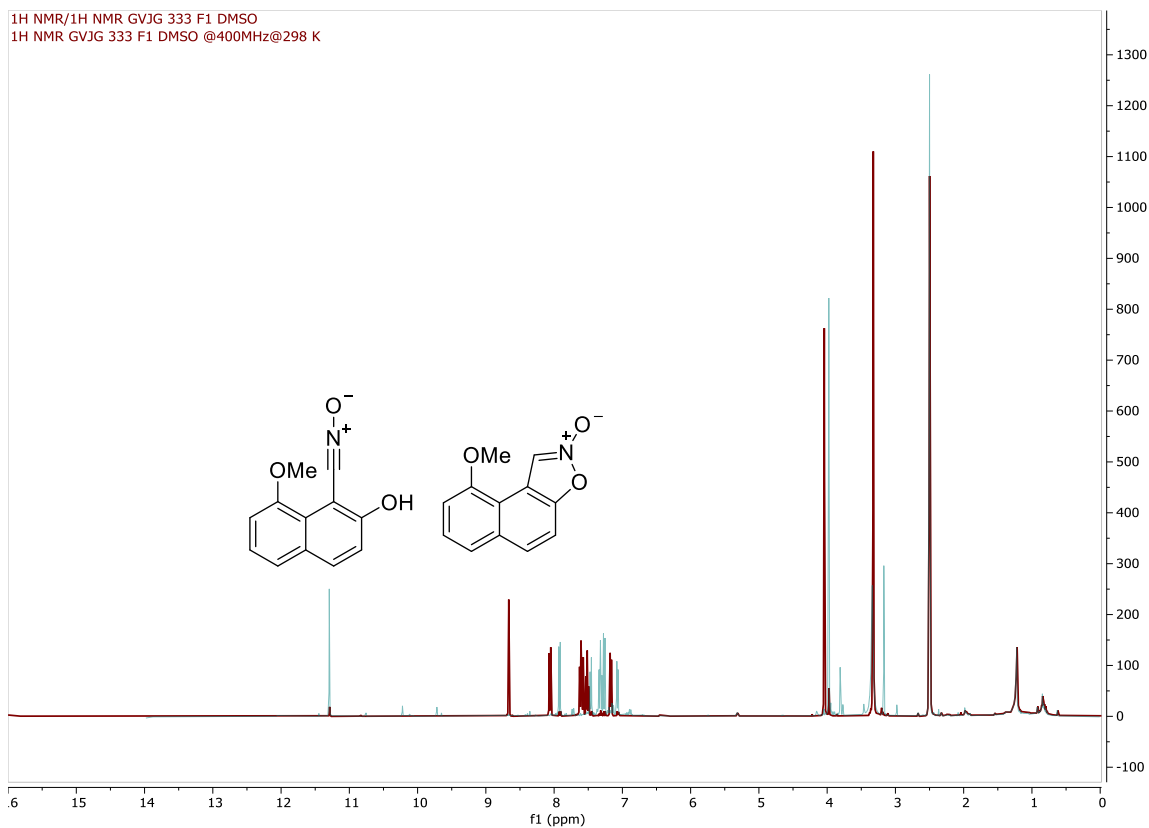



**Figure S59.**  $^1\text{H}$  NMR (400 MHz,  $\text{DMSO-}d_6$ ) of nitrile oxide (**9**) and isoxazole-2-oxide (**8**), superimposed.

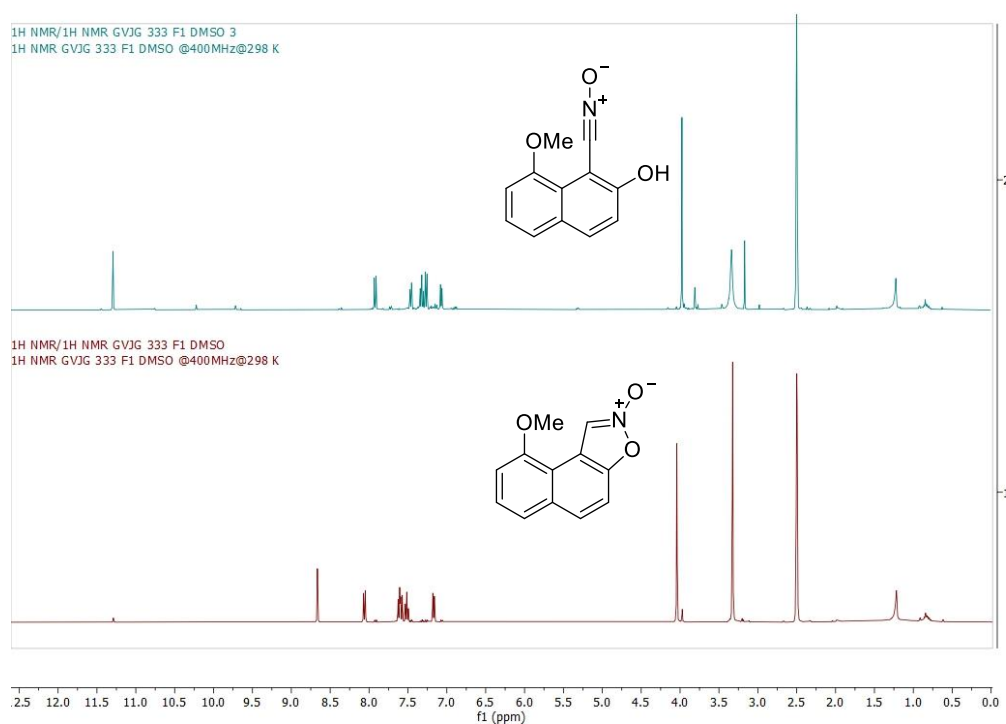

**Figure S60.**  $^1\text{H}$  NMR (400 MHz,  $\text{DMSO-}d_6$ ) of nitrile oxide (**9**) and isoxazole-2-oxide (**8**), stacked.

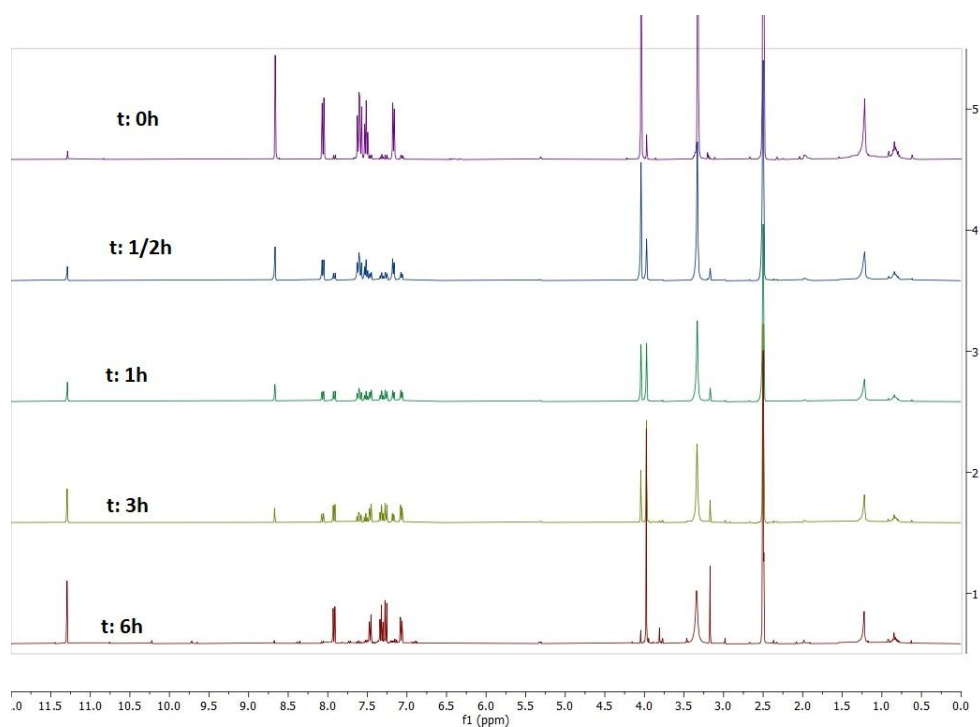

**Figure S61.**  $^1\text{H}$  NMR (400 MHz,  $\text{DMSO-}d_6$ ) time-course experiment of the ring opening of isoxazole-2-oxide (**8**) (top spectra) to nitrile oxide (**9**) (bottom spectra).

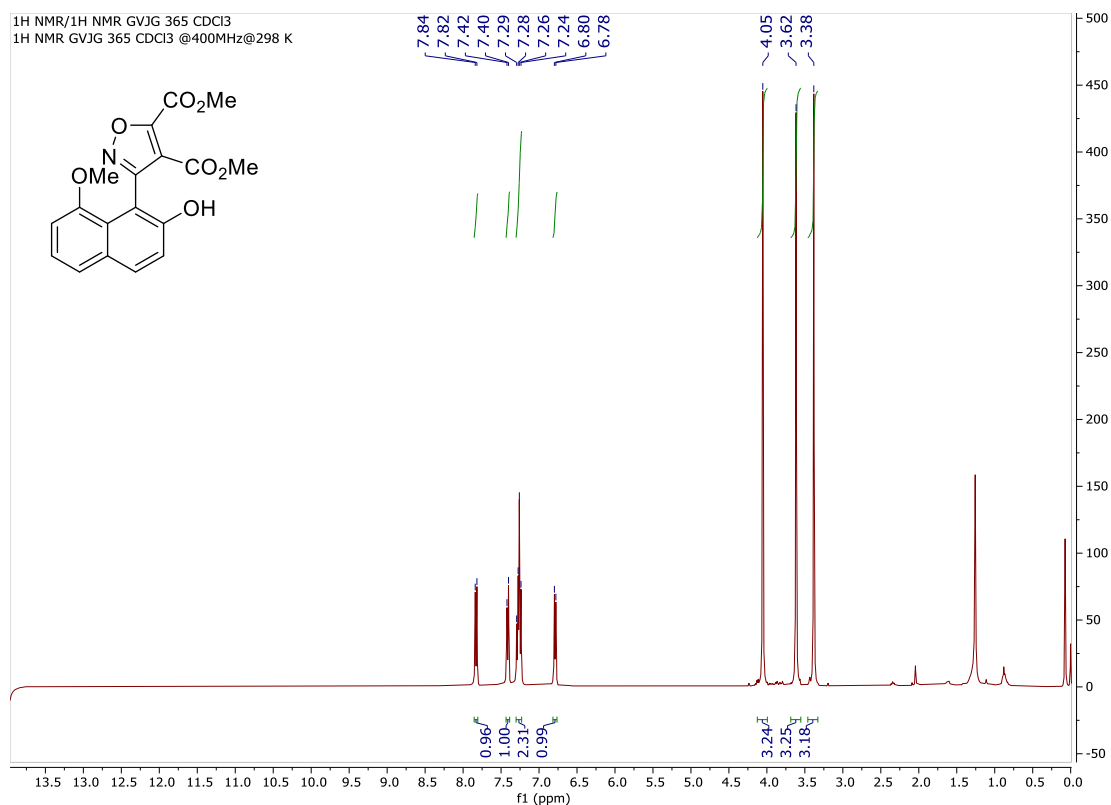

**Figure S62.** <sup>1</sup>H NMR (400 MHz, CDCl<sub>3</sub>) of (10a).

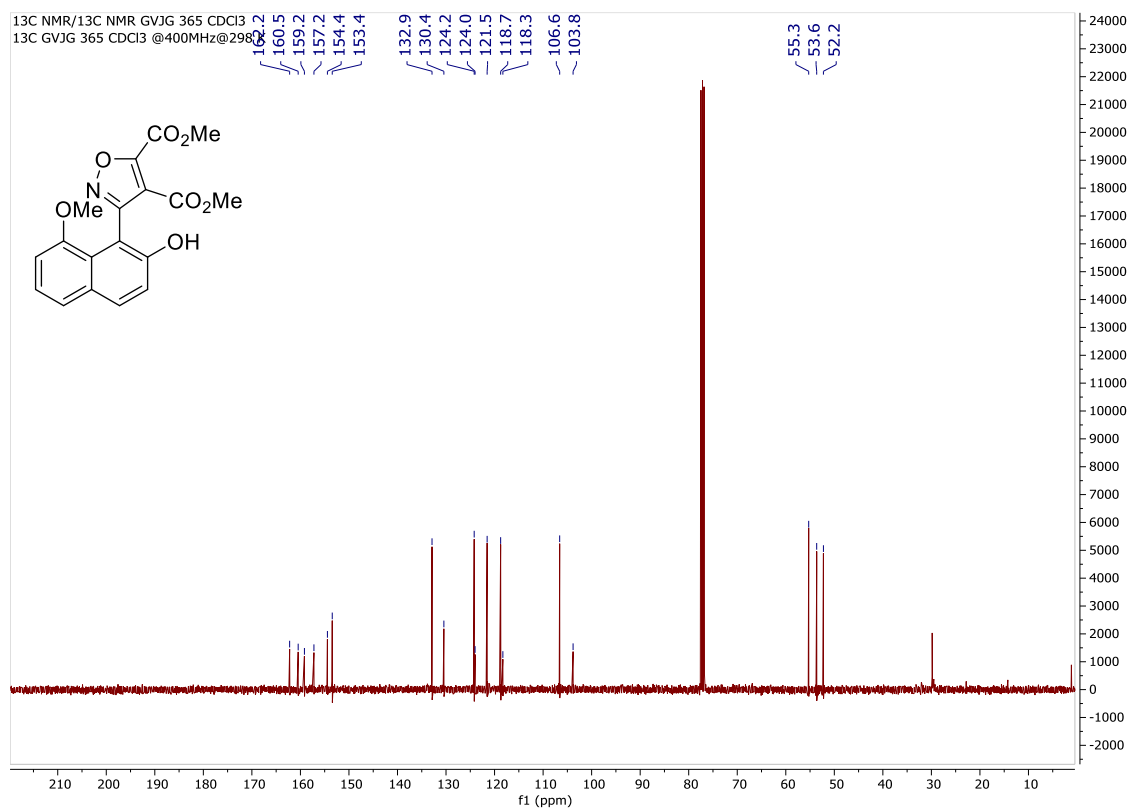

**Figure S63.** <sup>13</sup>C NMR (100.6 MHz, CDCl<sub>3</sub>) of (10a).

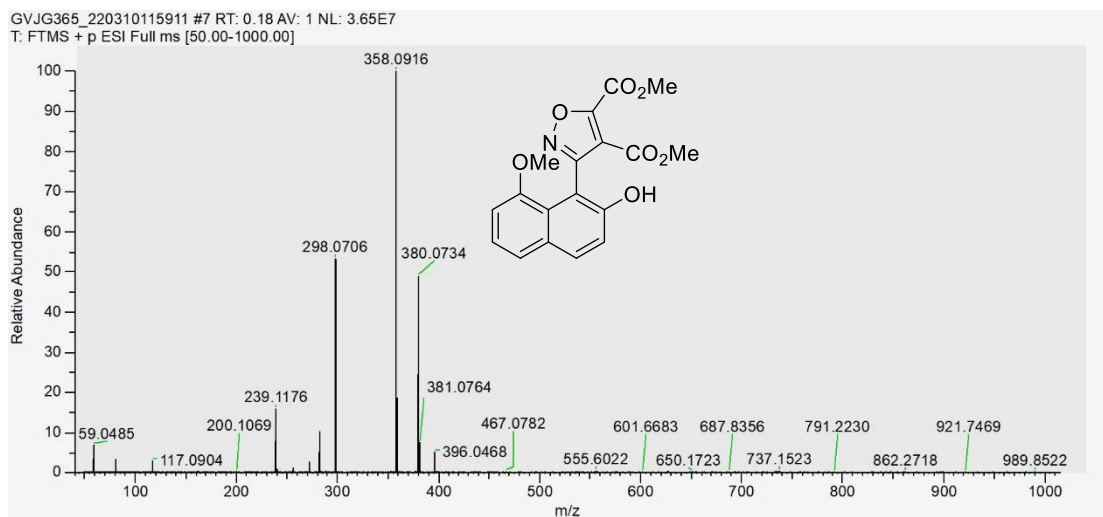

**Figure S64.** HRMS  $[M+H]^+$  of compound **(10a)** using 0.1%  $HCO_2H$  in MeOH as solvent.

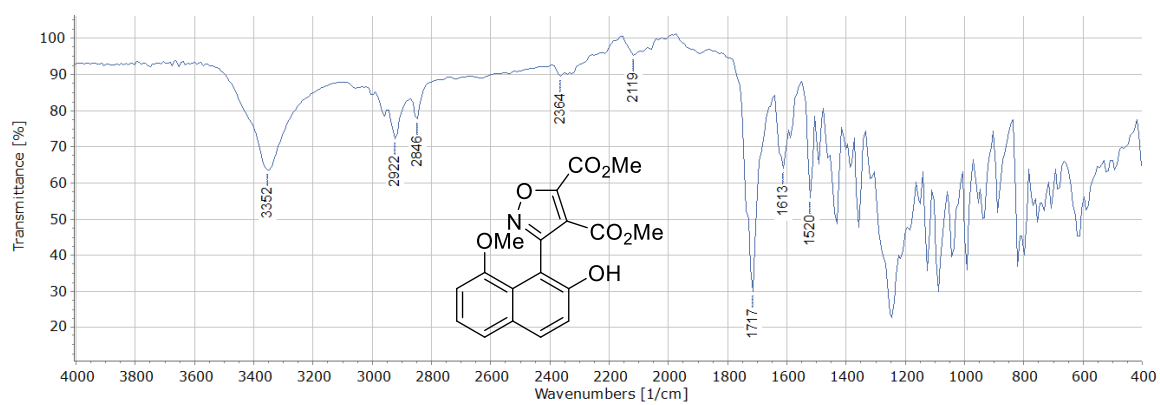

**Figure S65.** IR spectrum (solid) of **(10a)**.

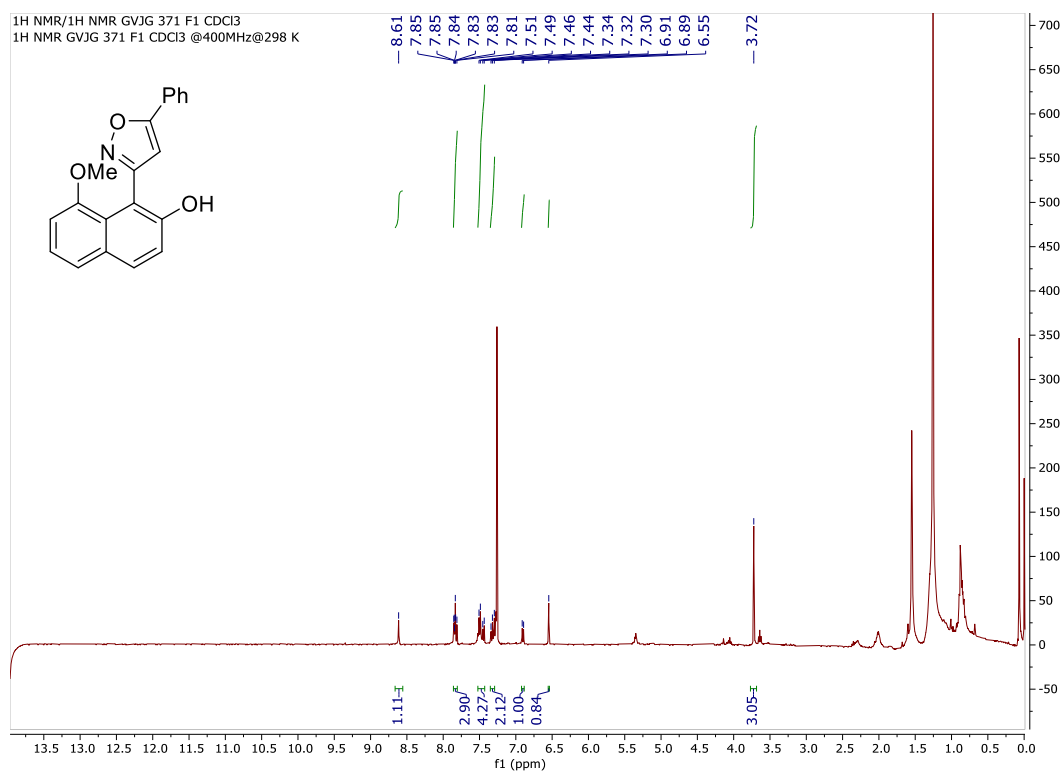

**Figure S66.** <sup>1</sup>H NMR (400 MHz, CDCl<sub>3</sub>) of **(10b)**.

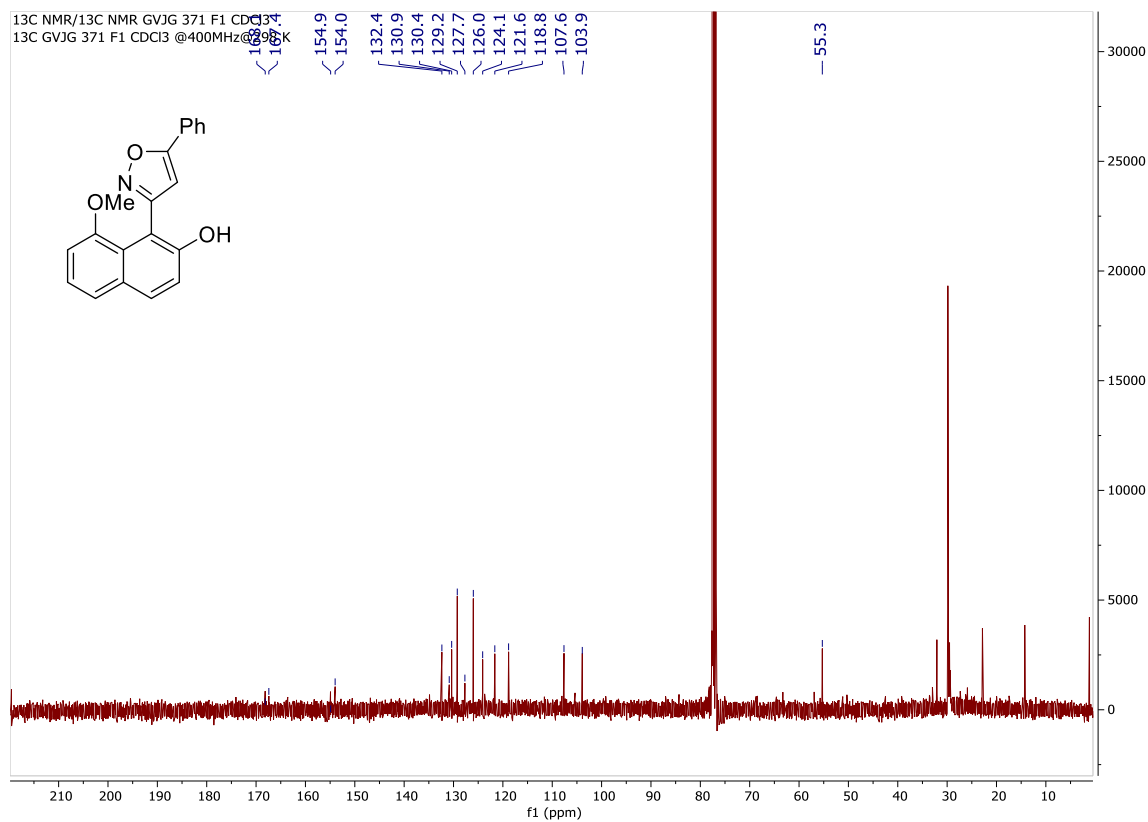

**Figure S67.** <sup>13</sup>C NMR (100.6 MHz, CDCl<sub>3</sub>) of **(10b)**.

GVJG371\_220720112325 #2 RT: 0.02 AV: 1 NL: 1.47E7  
T: FTMS + p ESI Full ms [50.00-1000.00]

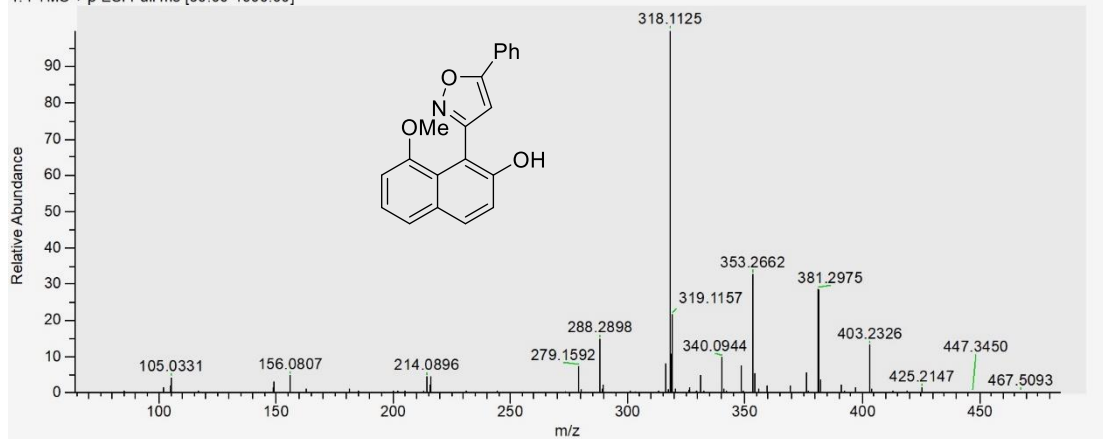

**Figure S68.** HRMS  $[M+H]^+$  of compound (10b) using 0.1%  $HCO_2H$  in MeOH as solvent.

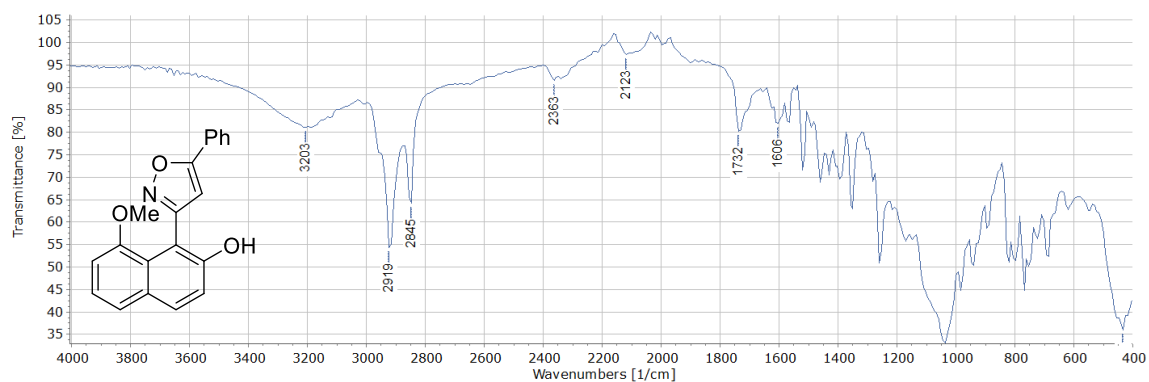

**Figure S69.** IR spectrum (solid) of (10b).

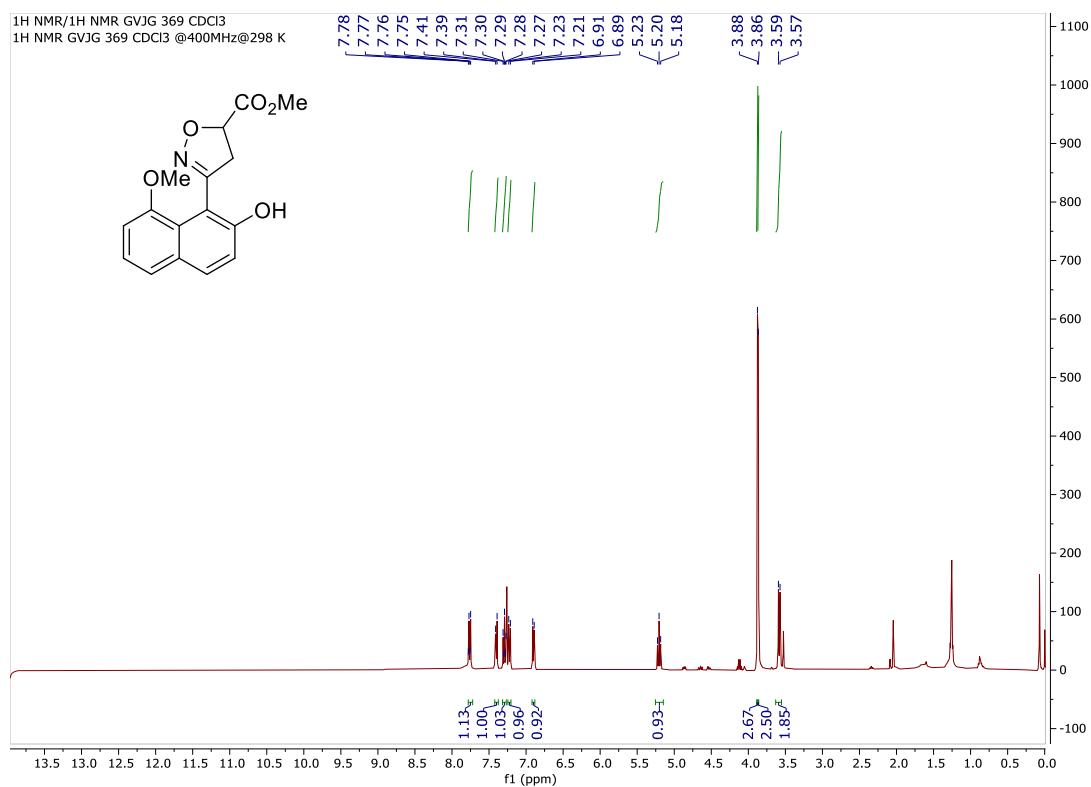

**Figure S70.** <sup>1</sup>H NMR (400 MHz, CDCl<sub>3</sub>) of **(10c)**.

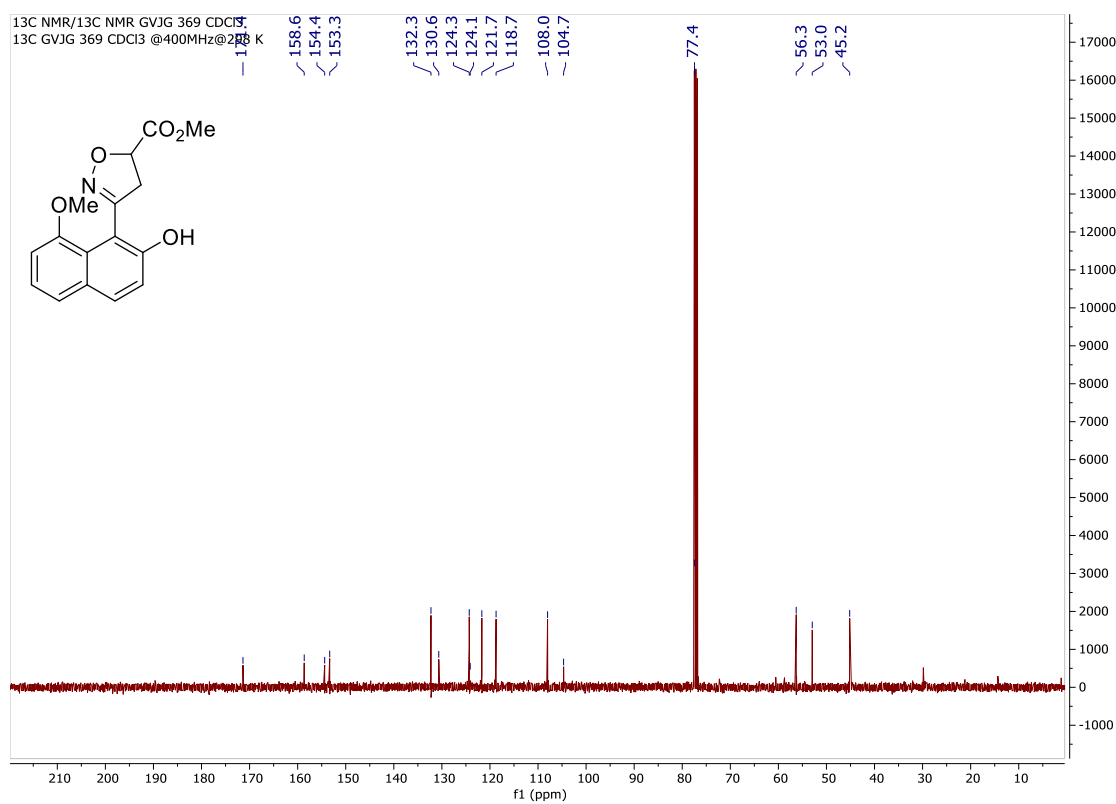

**Figure S71.** <sup>13</sup>C NMR (100.6 MHz, CDCl<sub>3</sub>) of **(10c)**.

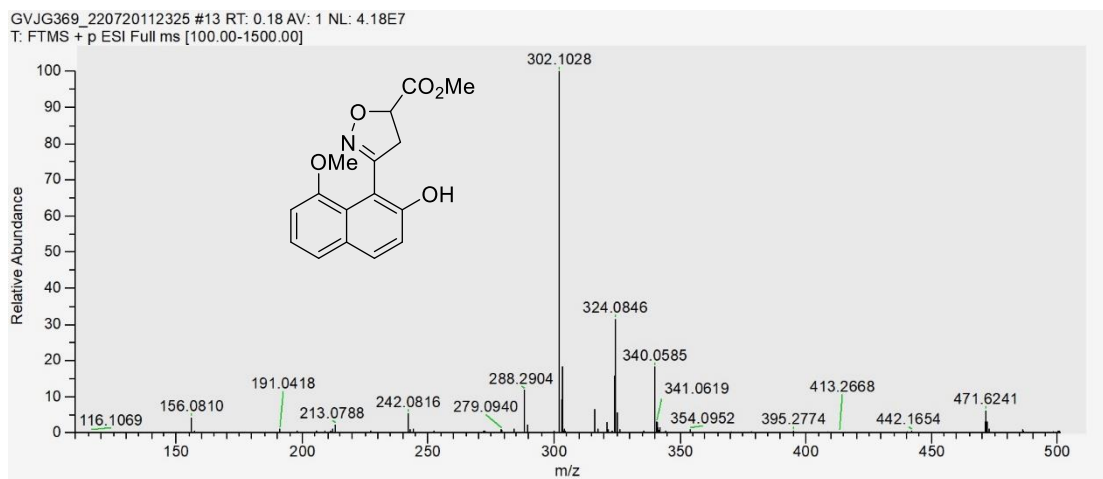

**Figure S72.** HRMS  $[M+H]^+$  of compound (**10c**) using 0.1%  $\text{HCO}_2\text{H}$  in MeOH as solvent.

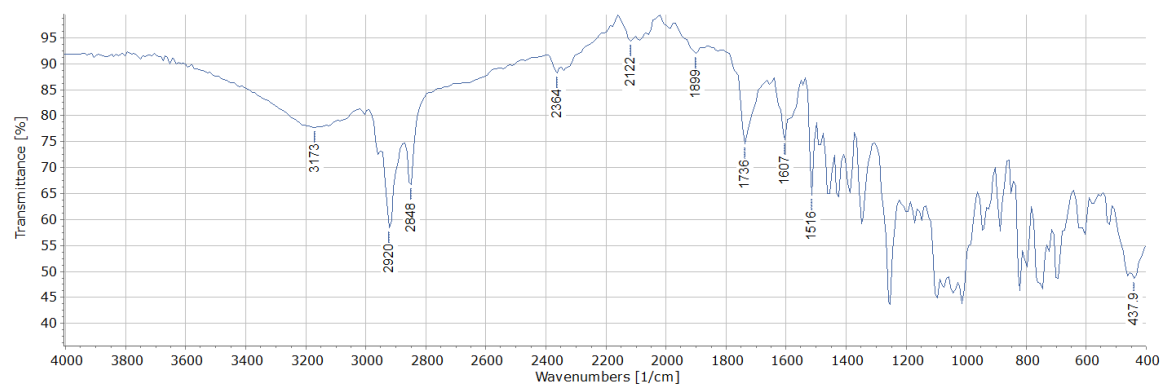

**Figure S73.** IR spectrum (solid) of (**10c**).

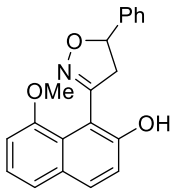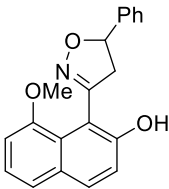



GVJG370\_220720112325 #4 RT: 0.05 AV: 1 NL: 1.73E8  
T: FTMS + p ESI Full ms [50.00-1000.00]

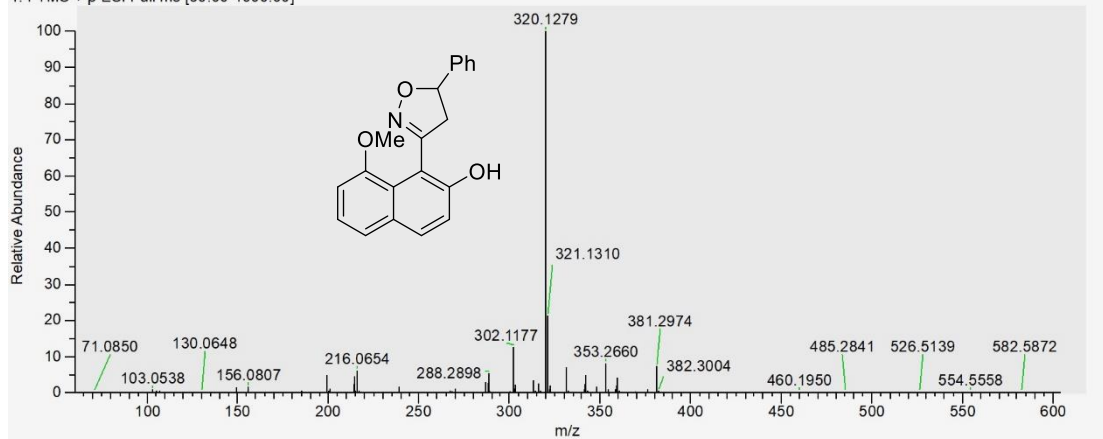

**Figure S76.** HRMS  $[M+H]^+$  of compound (**10d**) using 0.1%  $\text{HCO}_2\text{H}$  in MeOH as solvent.

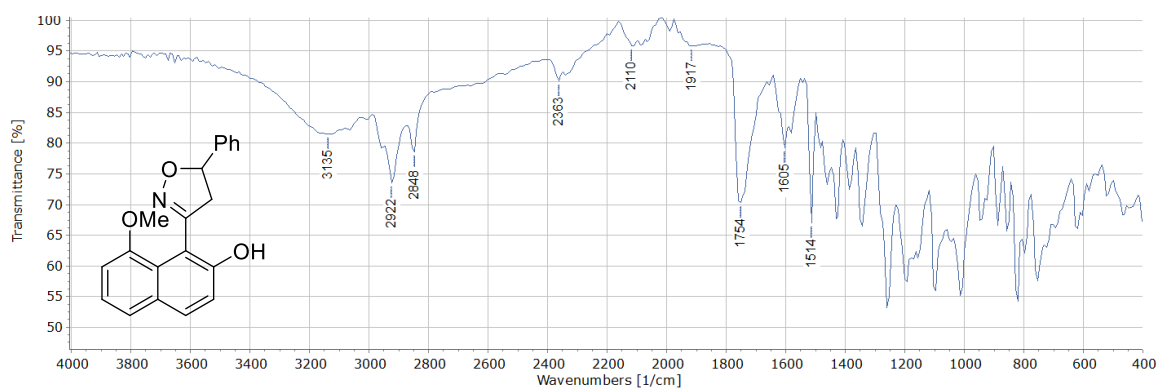

**Figure S77.** IR spectrum (solid) of (**10d**).
